# Supplementary material for: Albatredines A and B, a pair of epimers with unusual natural heterocyclic skeletons from edible mushroom Albatrellus confluens
Source: Royal Society of Chemistry journal article supplement (doi:10.1039/c8ra04226h), 2018-01-01
Supplement: c8ra04226h1.pdf [file c8ra04226h1.pdf]

**Albatredine A and B, a pair of epimers with Unusual Natural  
Heterocyclic Skeletons from Edible Mushroom *Albatrellus  
confluens***

Shuaibing Zhang, Ying Huang, Shijun He, Zhenghui Li, Heping Chen, Bin Wu,  
Jianping Zuo, Tao Feng and Jikai Liu

## Contents

### 1. Supplementary Figures

- Figure S1.  $^1\text{H}$  NMR spectrum in methanol- $d_4$  for Compound **1**
- Figure S2.  $^{13}\text{C}$  NMR and DEPT spectrum in methanol- $d_4$  for Compound **1**
- Figure S3.  $^1\text{H}$ - $^1\text{H}$  COSY spectrum in methanol- $d_4$  for Compound **1**
- Figure S4. HSQC spectrum in methanol- $d_4$  for Compound **1**
- Figure S5. HMBC spectrum in methanol- $d_4$  for Compound **1**
- Figure S6.  $^1\text{H}$  NMR spectrum in DMSO- $d_6$  for Compound **1**
- Figure S7.  $^{13}\text{C}$  NMR spectrum in DMSO- $d_6$  for Compound **1**
- Figure S8.  $^1\text{H}$ - $^1\text{H}$  COSY spectrum in DMSO- $d_6$  for Compound **1**
- Figure S9. HMBC spectrum in DMSO- $d_6$  for Compound **1**
- Figure S10. HRESIMS spectrum for Compound **1**
- Figure S11.  $^1\text{H}$  NMR spectrum in methanol- $d_4$  for Compound **2**
- Figure S12.  $^{13}\text{C}$  NMR and DEPT spectrum in methanol- $d_4$  for Compound **2**
- Figure S13.  $^1\text{H}$ - $^1\text{H}$  COSY spectrum in methanol- $d_4$  for Compound **2**
- Figure S14. HSQC spectrum in methanol- $d_4$  for Compound **2**
- Figure S15. HMBC spectrum in methanol- $d_4$  for Compound **2**
- Figure S16. HRESIMS spectrum for Compound **2**

### 2. Computational details for **1** and **2**

#### 2.1 $^{13}\text{C}$ NMR calculation details for **1** and **2**

- Figure S17. Optimized conformers of **1a** (**1a1-1a11**)
- Table S1. Energy analysis for conformers of **1a1-1a11** at B3LYP/6-31G(d) level in the gas phase
- Figure S18. Optimized conformers of **1b** (**1b1-1b12**).
- Table S2. Energy analysis for conformers of **1b1-1b12** at B3LYP/6-31G(d) level in the gas phase
- Figure S19. Optimized conformers of **1c** (**1c1-1c11**).
- Table S3. Energy analysis for conformers of **1c1-1c11** at B3LYP/6-31G(d) level in the gas phase
- Figure S20. Optimized conformers of **1d** (**1d1-1d10**).
- Table S4. Energy analysis for conformers of **1d1-1d10** at B3LYP/6-31G(d) level in the gas phase
- Table S5.  $^{13}\text{C}$  NMR calculation details for **1a**
- Table S6.  $^1\text{H}$  NMR calculation details for **1a**
- Table S7.  $^{13}\text{C}$  NMR calculation details for **1b**
- Table S8.  $^1\text{H}$  NMR calculation details for **1b**
- Table S9.  $^{13}\text{C}$  NMR calculation details for **1c**
- Table S10.  $^1\text{H}$  NMR calculation details for **1c**
- Table S11.  $^{13}\text{C}$  NMR calculation details for **1d**
- Table S12.  $^1\text{H}$  NMR calculation details for **1d**
- Figure S21. Left: Regression analysis of experimental versus calculated  $^{13}\text{C}$  NMR chemical shifts of **1** at mPW1PW91/6-311g(d,p) level; linear fitting was shown as a line; Right: Relative chemical shift errors between scaled  $^{13}\text{C}$  NMR and experimental  $^{13}\text{C}$  NMR for **1** ( $\delta_{\text{corr}}$  obtained by linear fit  $\delta_{\text{exp}}$  versus  $\delta_{\text{calcd}}$ ).
- Figure S22. Left: Regression analysis of experimental versus calculated  $^1\text{H}$  NMR chemical shifts of **1** at mPW1PW91/6-311g(d,p) level; linear fitting was shown as a line; Right: Relative chemical shift errors between scaled  $^1\text{H}$  NMR and experimental  $^1\text{H}$  NMR for **1** ( $\delta_{\text{corr}}$  obtained by linear fit  $\delta_{\text{exp}}$  versus  $\delta_{\text{calcd}}$ ).

Figure S23. Left: Regression analysis of experimental versus calculated  $^{13}\text{C}$  NMR chemical shifts of **2** at mPW1PW91/6-311g(d,p) level; linear fitting was shown as a line; Right: Relative chemical shift errors between scaled  $^{13}\text{C}$  NMR and experimental  $^{13}\text{C}$  NMR for **2** ( $\delta_{\text{corr}}$  obtained by linear fit  $\delta_{\text{exp}}$  versus  $\delta_{\text{calcd}}$ ).

Figure S24. Left: Regression analysis of experimental versus calculated  $^1\text{H}$  NMR chemical shifts of **2** at mPW1PW91/6-311g(d,p) level; linear fitting was shown as a line; Right: Relative chemical shift errors between scaled  $^1\text{H}$  NMR and experimental  $^1\text{H}$  NMR for **2** ( $\delta_{\text{corr}}$  obtained by linear fit  $\delta_{\text{exp}}$  versus  $\delta_{\text{calcd}}$ ).

Table S13. The DP4+ probabilities of **1a**, **1b**, **1c** and **1d**

## 2.2 ECD calculation details for **1a**, **1c**, **1e** and **1f**

Figure S25. Optimized conformers of **1e** (**1e1-1e11**).

Table S14. Energy analysis for conformers of **1e1-1e11** at B3LYP/6-31G(d) level in the gas phase

Figure S26. Optimized conformers of **1f** (**1f1-1f11**).

Table S15. Energy analysis for conformers of **1f1-1f11** at B3LYP/6-31G(d) level in the gas phase

Figure S27. Comparison of the calculated ECD spectra with the experimental spectrum.

## 2.3 Determination of the substitution pattern.

Figure S28. Optimized conformers of **1g** (**1g1-1g10**).

Table S16. Energy analysis for conformers of **1g1-1g10** at B3LYP/6-31G(d) level in the gas phase

Figure S29. Optimized conformers of **1h** (**1h1-1h3**).

Table S17. Energy analysis for conformers of **1h1-1h3** at B3LYP/6-31G(d) level in the gas phase

Table S18.  $^{13}\text{C}$  NMR calculation details for **1g**

Table S19.  $^{13}\text{C}$  NMR calculation details for **1h**

Table S20. The DP4+ probabilities of **1a**, **1g** and **1h**.

## 3. References

# 1. Supplementary Figures

Figure S1.  $^1\text{H}$  NMR spectrum in methanol- $d_4$  for Compound 1

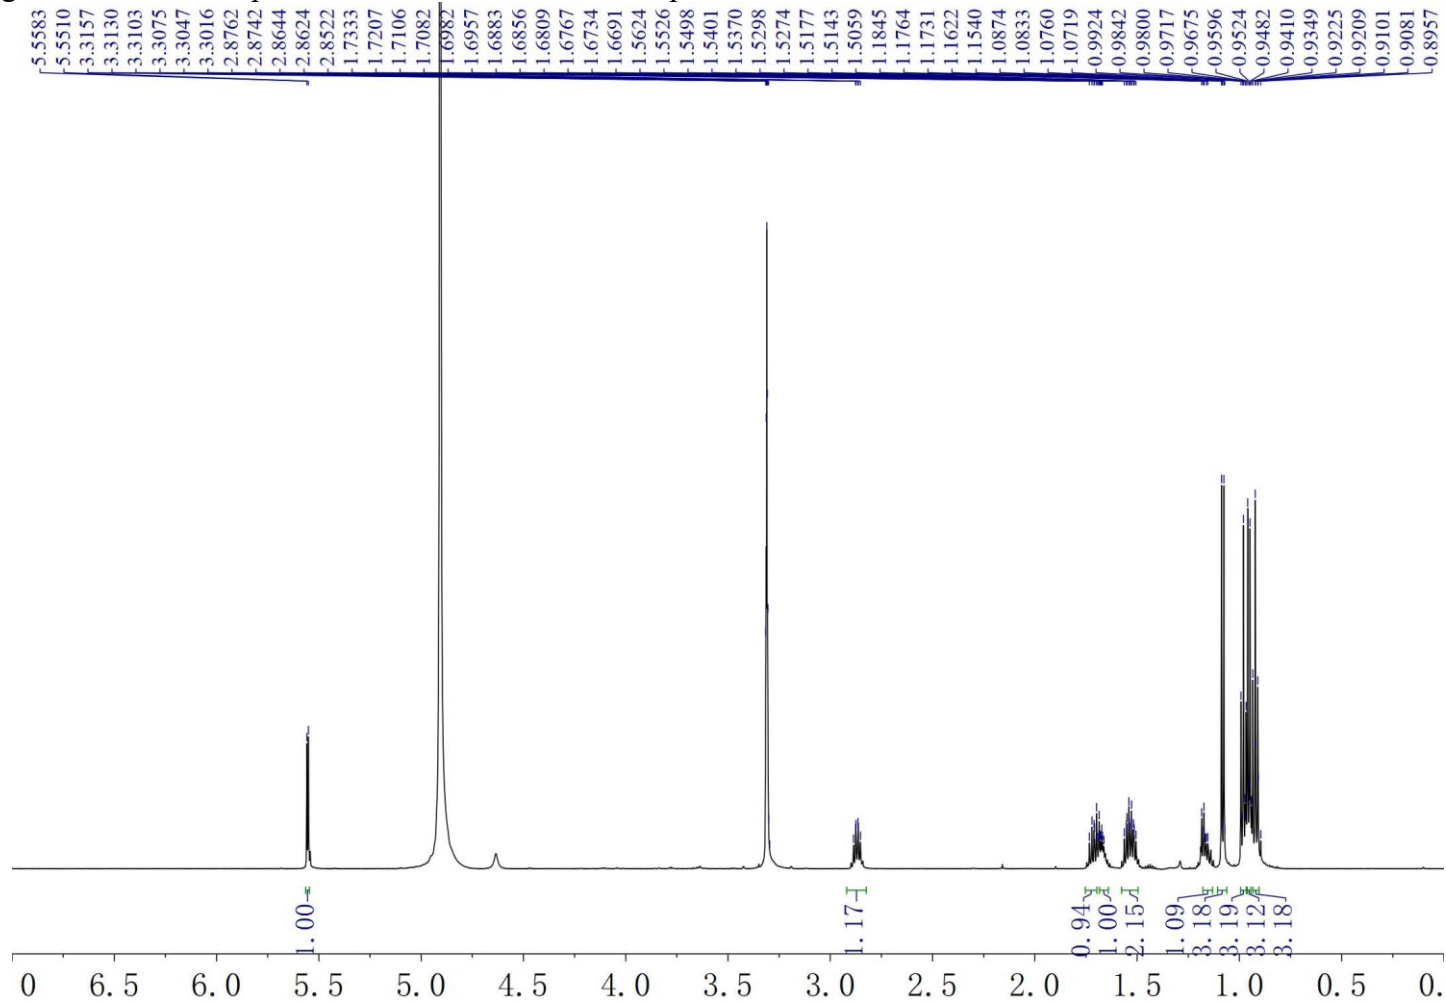

Figure S2.  $^{13}\text{C}$  NMR and DEPT spectrum in methanol- $d_4$  for Compound 1

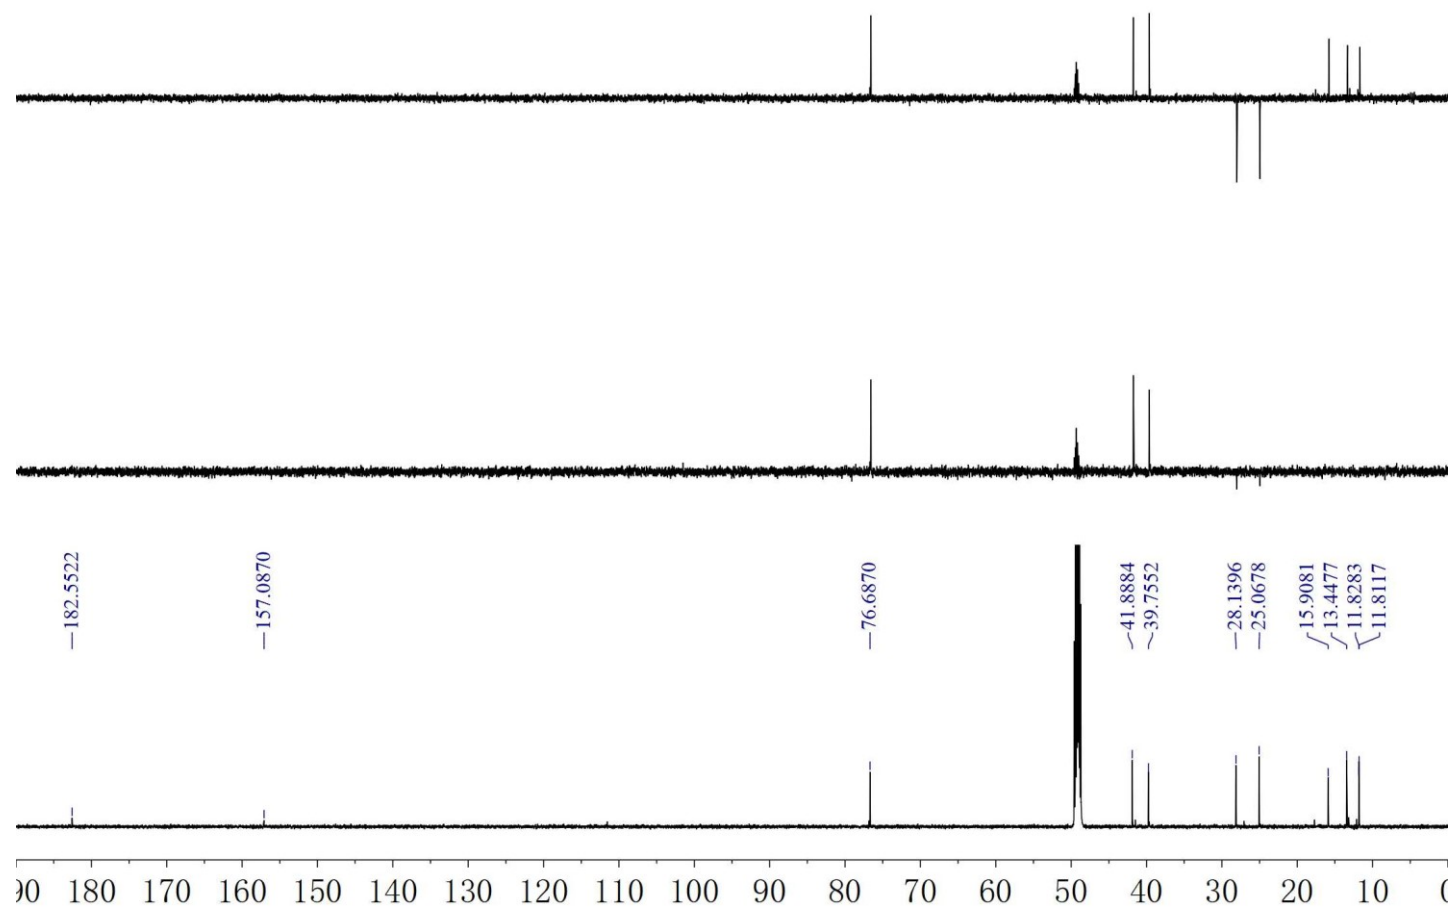

Figure S3.  $^1\text{H}$ - $^1\text{H}$  COSY spectrum in methanol- $d_4$  for Compound 1

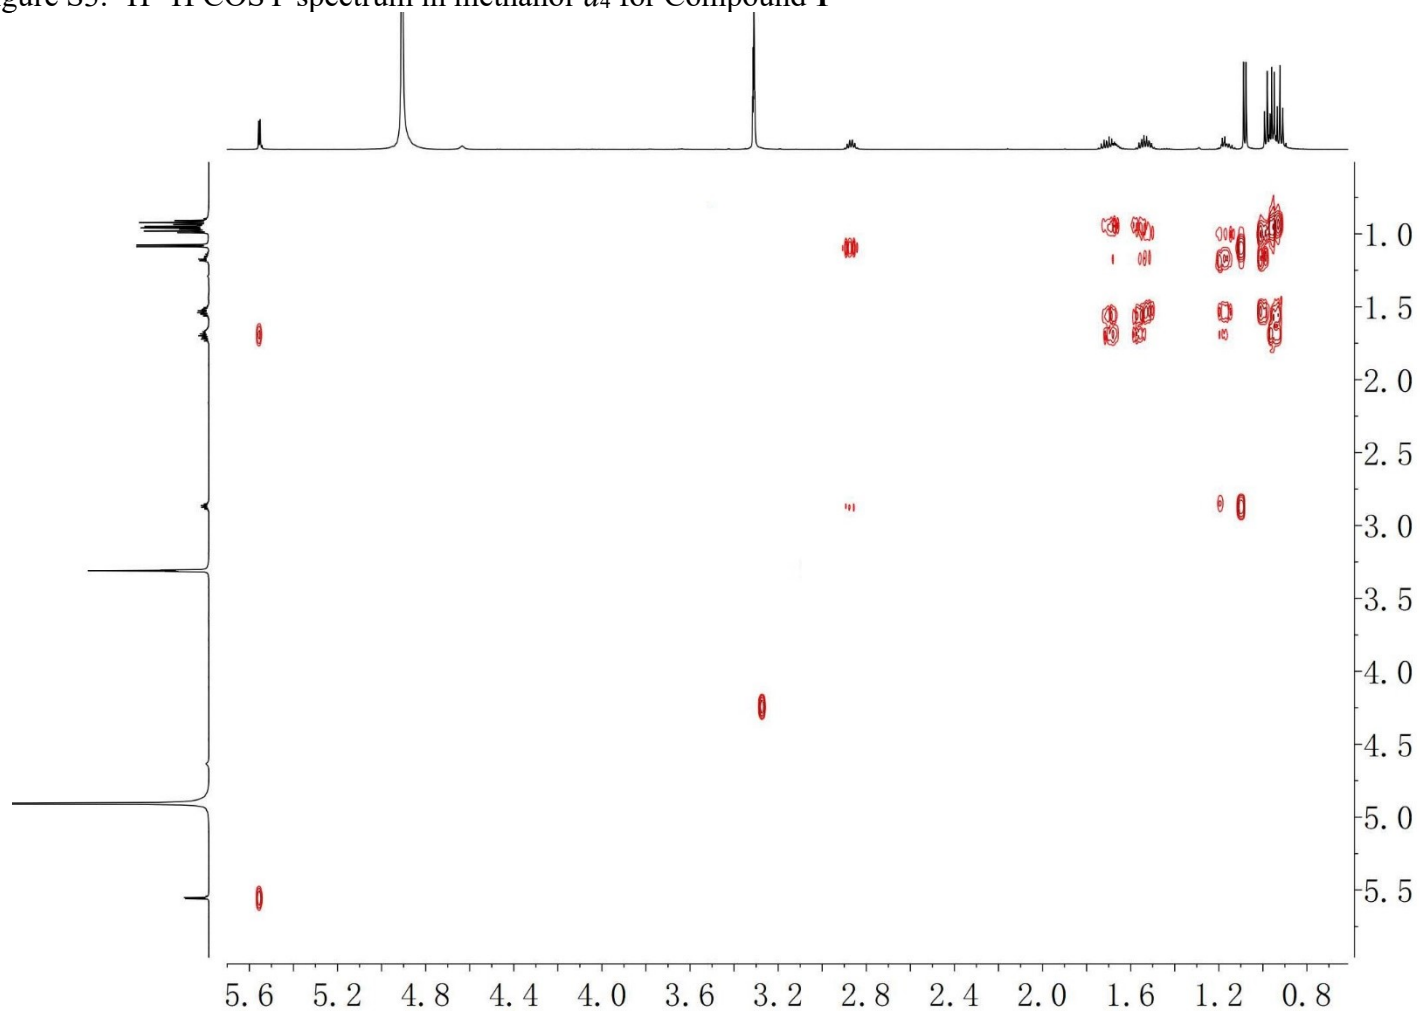

Figure S4. HSQC spectrum in methanol-*d*<sub>4</sub> for Compound **1**

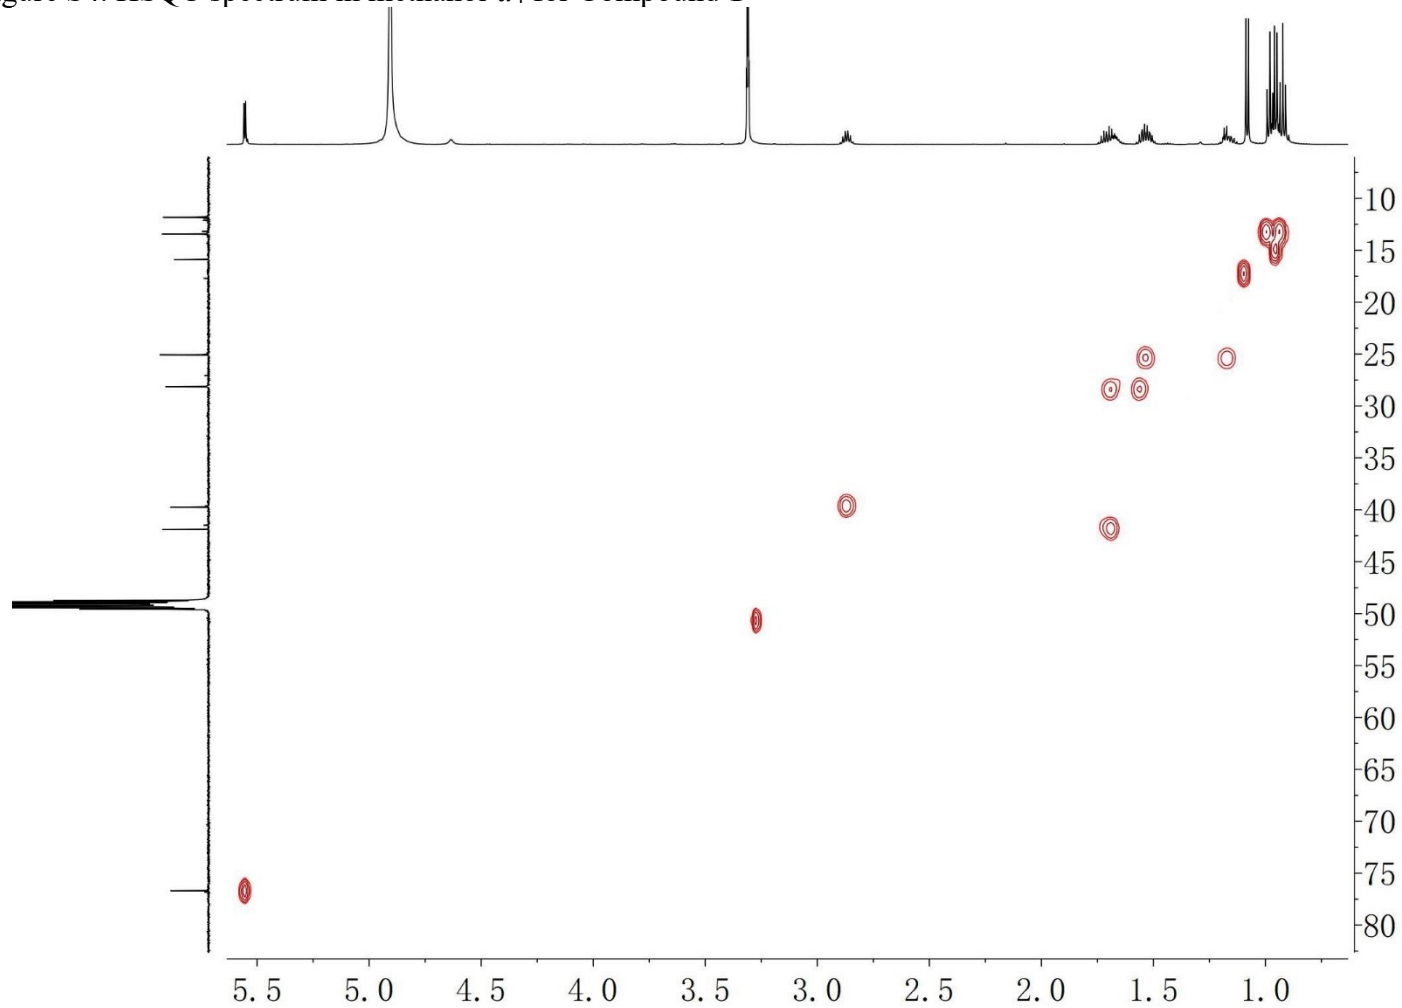

Figure S5. HMBC spectrum in methanol- $d_4$  for Compound **1**

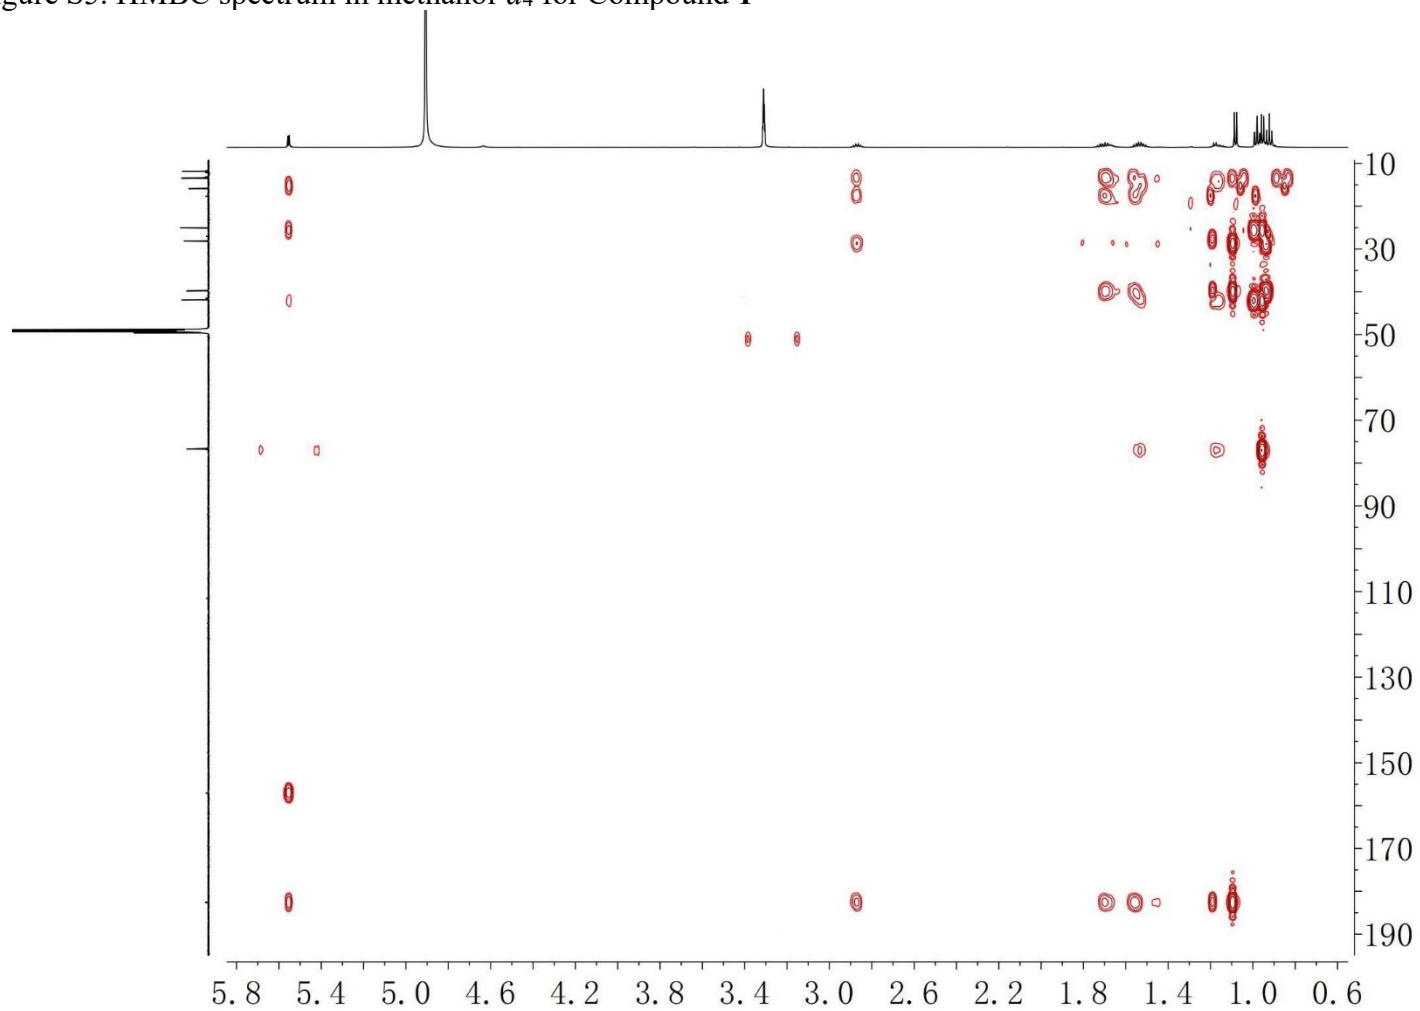



Figure S6.  $^1\text{H}$  NMR spectrum in  $\text{DMSO-}d_6$  for Compound **1**

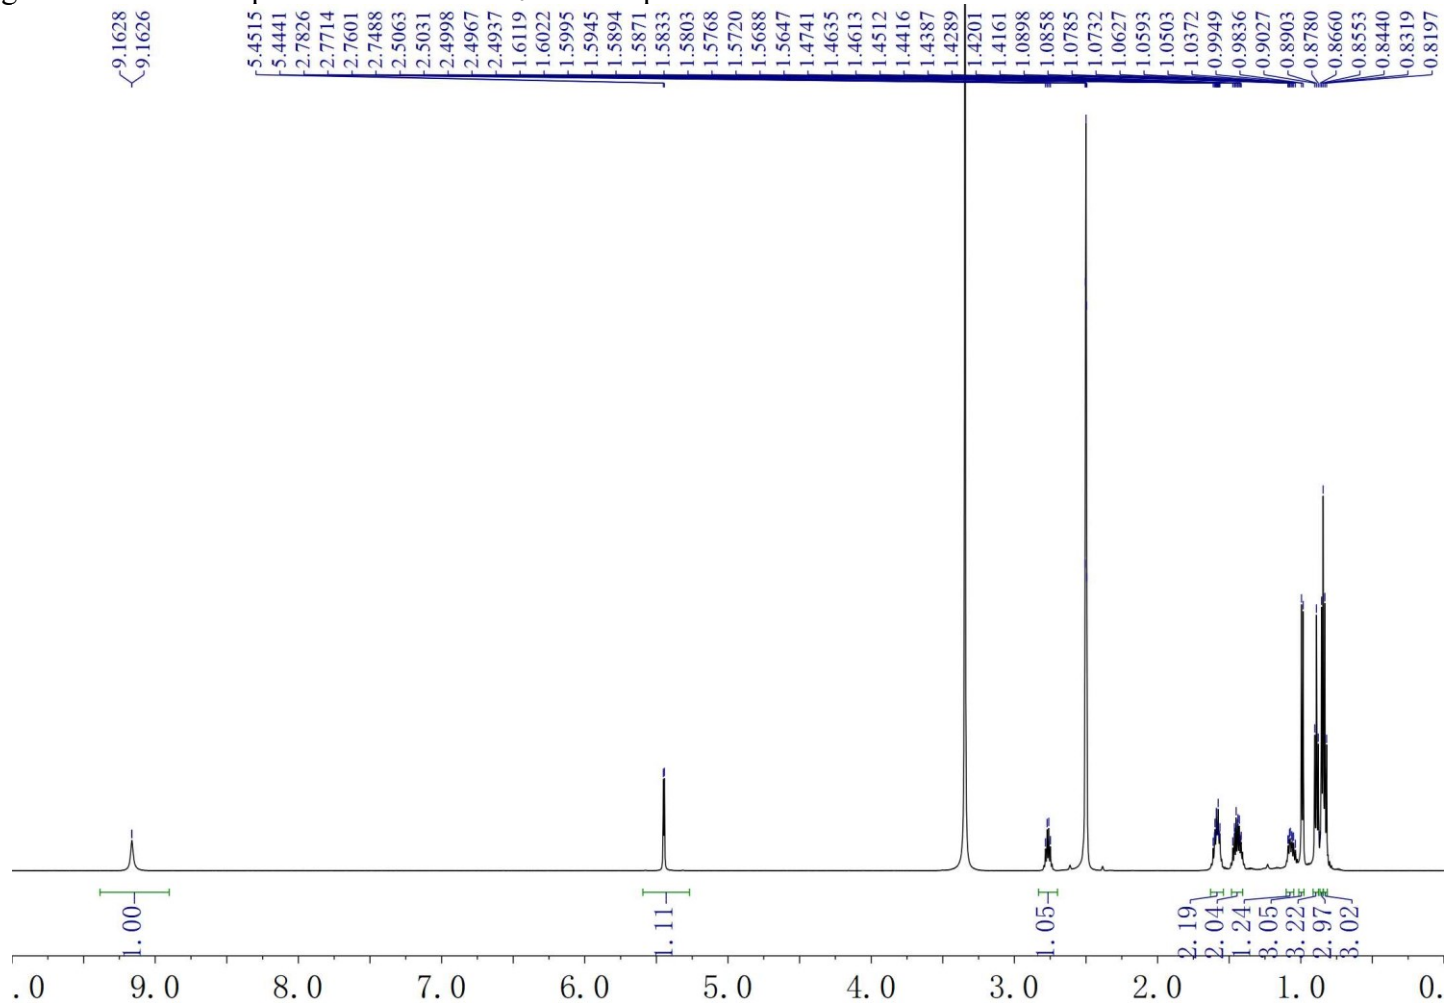

Figure S7.  $^{13}\text{C}$  NMR spectrum in  $\text{DMSO-}d_6$  for Compound 1

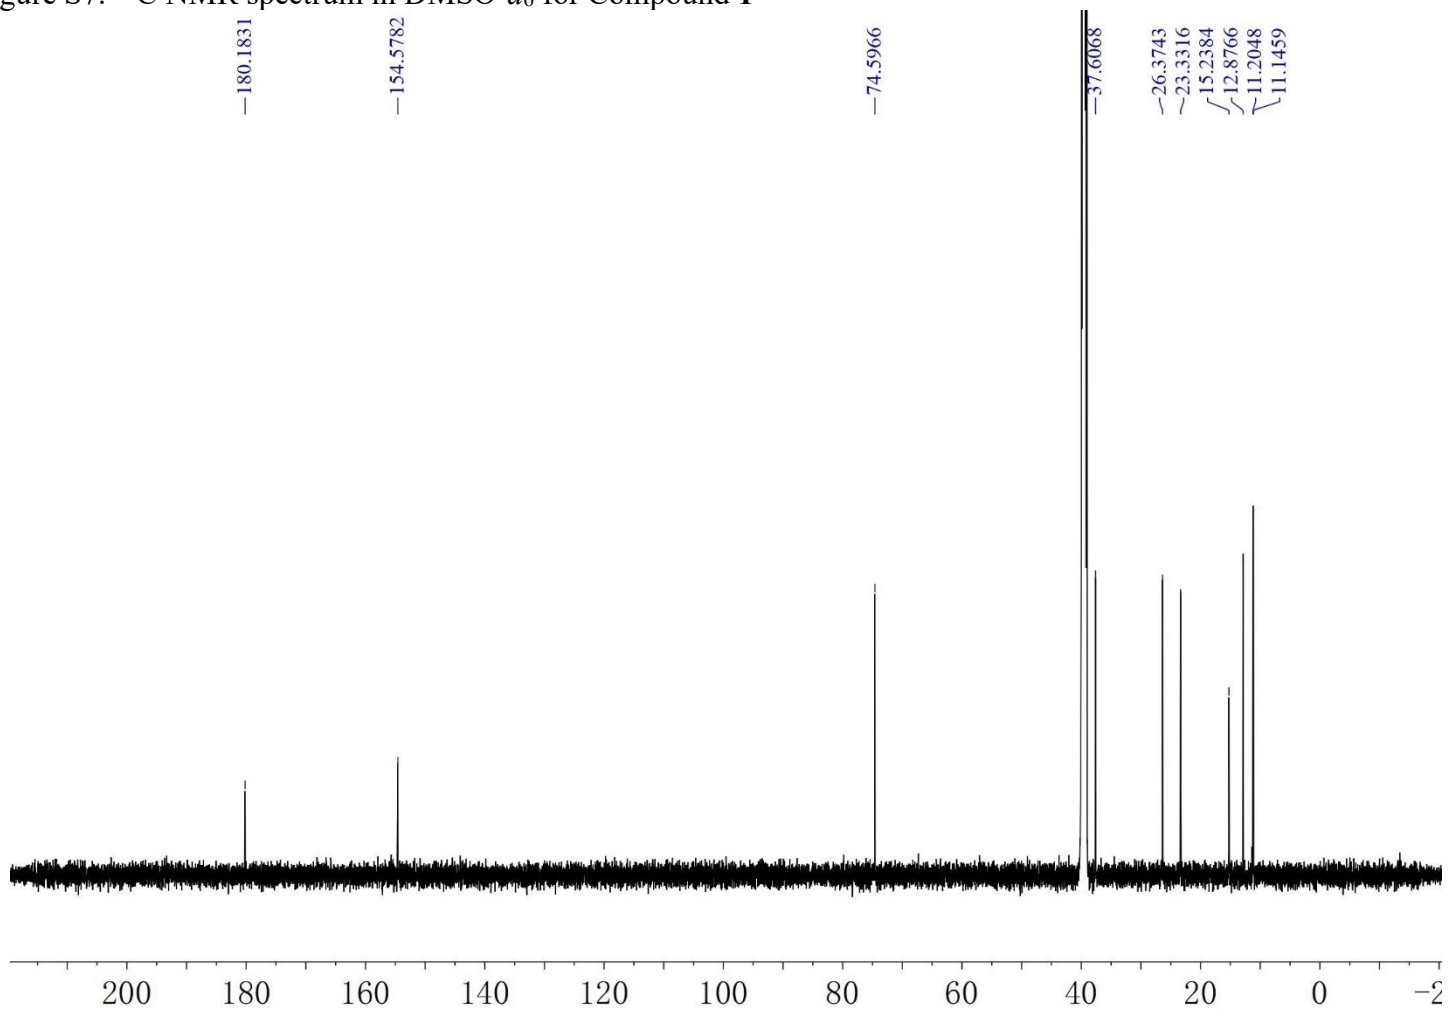

Figure S8.  $^1\text{H}$ - $^1\text{H}$  COSY spectrum in  $\text{DMSO-}d_6$  for Compound **1**

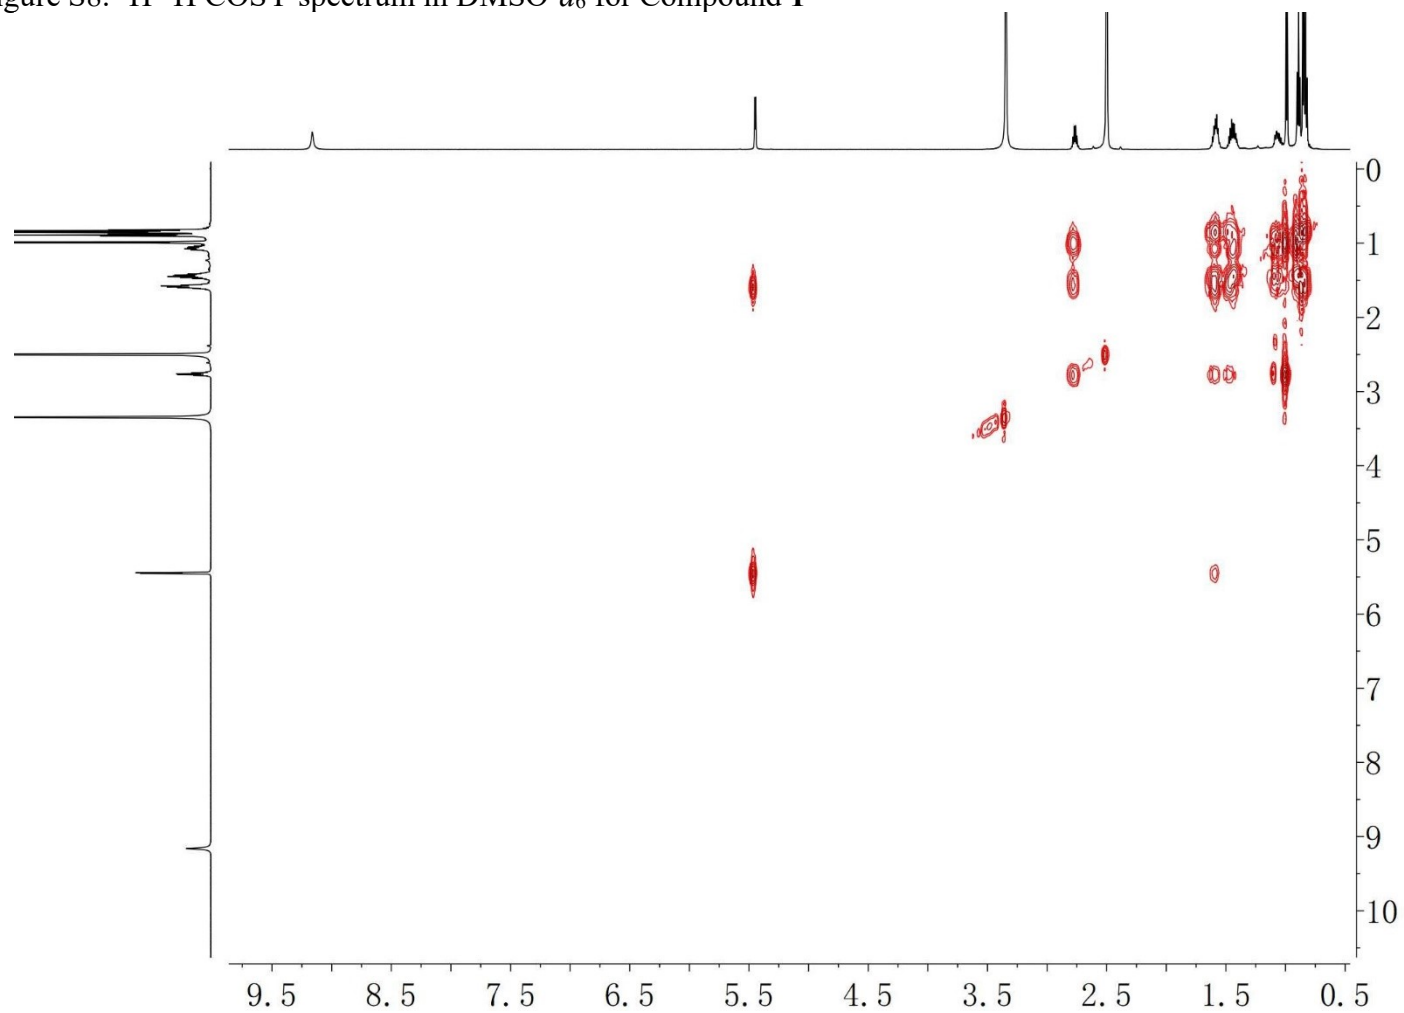

Figure S9. HMBC spectrum in DMSO- $d_6$  for Compound **1**

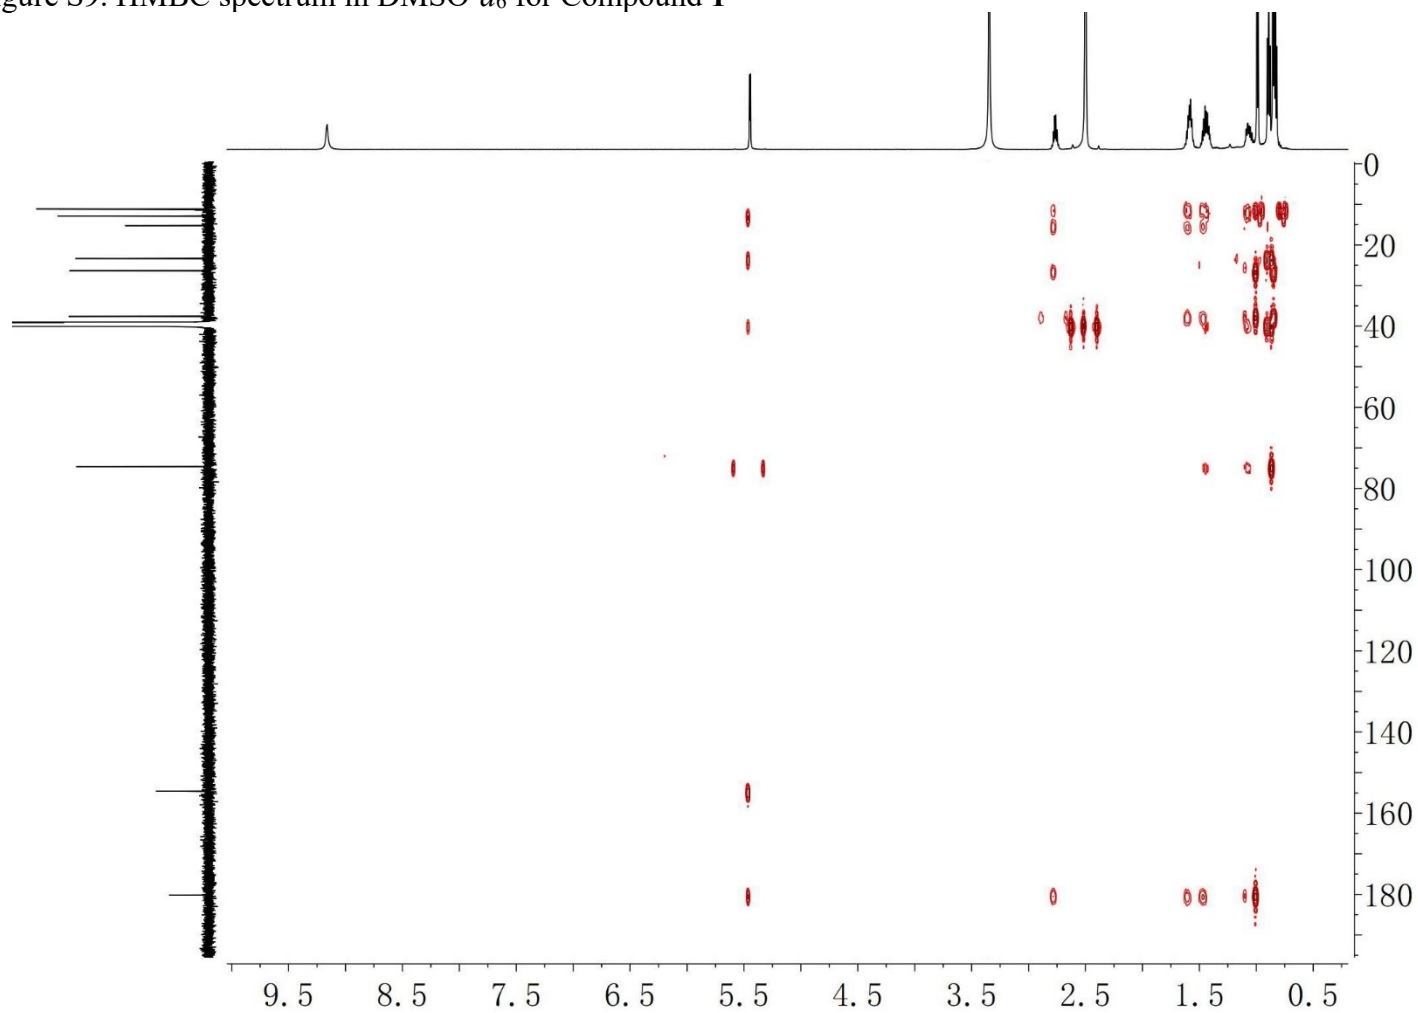

Figure S10. HRESIMS spectrum for Compound 1

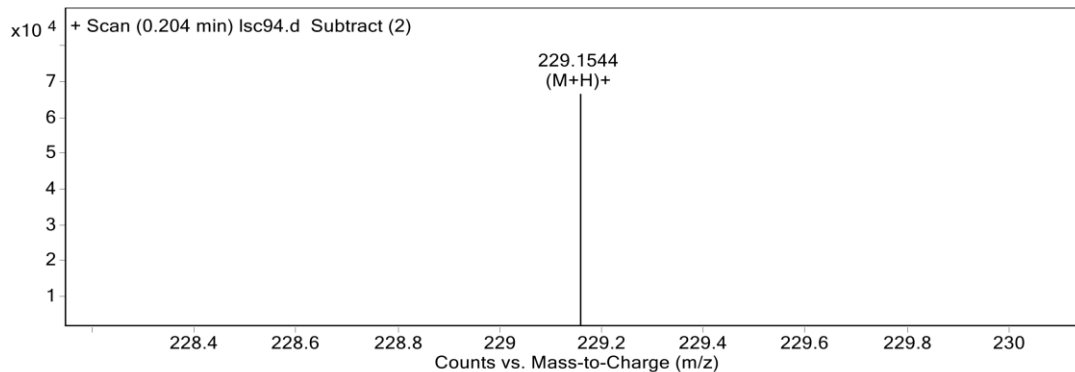

**Peak List**

| <i>m/z</i> | <i>z</i> | Abund    | Formula       | Ion    |
|------------|----------|----------|---------------|--------|
| 118.0864   | 1        | 7392.96  |               |        |
| 130.0866   | 1        | 23912.34 |               |        |
| 229.1544   | 1        | 67032.44 | C11 H20 N2 O3 | (M+H)+ |
| 230.1581   | 1        | 9165.5   | C11 H20 N2 O3 | (M+H)+ |
| 251.1365   |          | 25167.27 |               |        |
| 267.1106   | 1        | 19084.79 |               |        |
| 303.1911   | 1        | 9017.3   |               |        |
| 313.1069   | 1        | 12935.8  |               |        |

**Formula Calculator Element Limits**

| Element | Min | Max |
|---------|-----|-----|
| C       | 3   | 60  |
| H       | 0   | 120 |
| O       | 0   | 30  |
| N       | 0   | 10  |

**Formula Calculator Results**

| Formula       | CalculatedMass | CalculatedMz | Mz       | Diff. (mDa) | Diff. (ppm) | DBE    |
|---------------|----------------|--------------|----------|-------------|-------------|--------|
| C11 H20 N2 O3 | 228.1474       | 229.1547     | 229.1544 | 0.1         | 0.5         | 3.0000 |

Figure S11.  $^1\text{H}$  NMR spectrum in methanol- $d_4$  for Compound 2

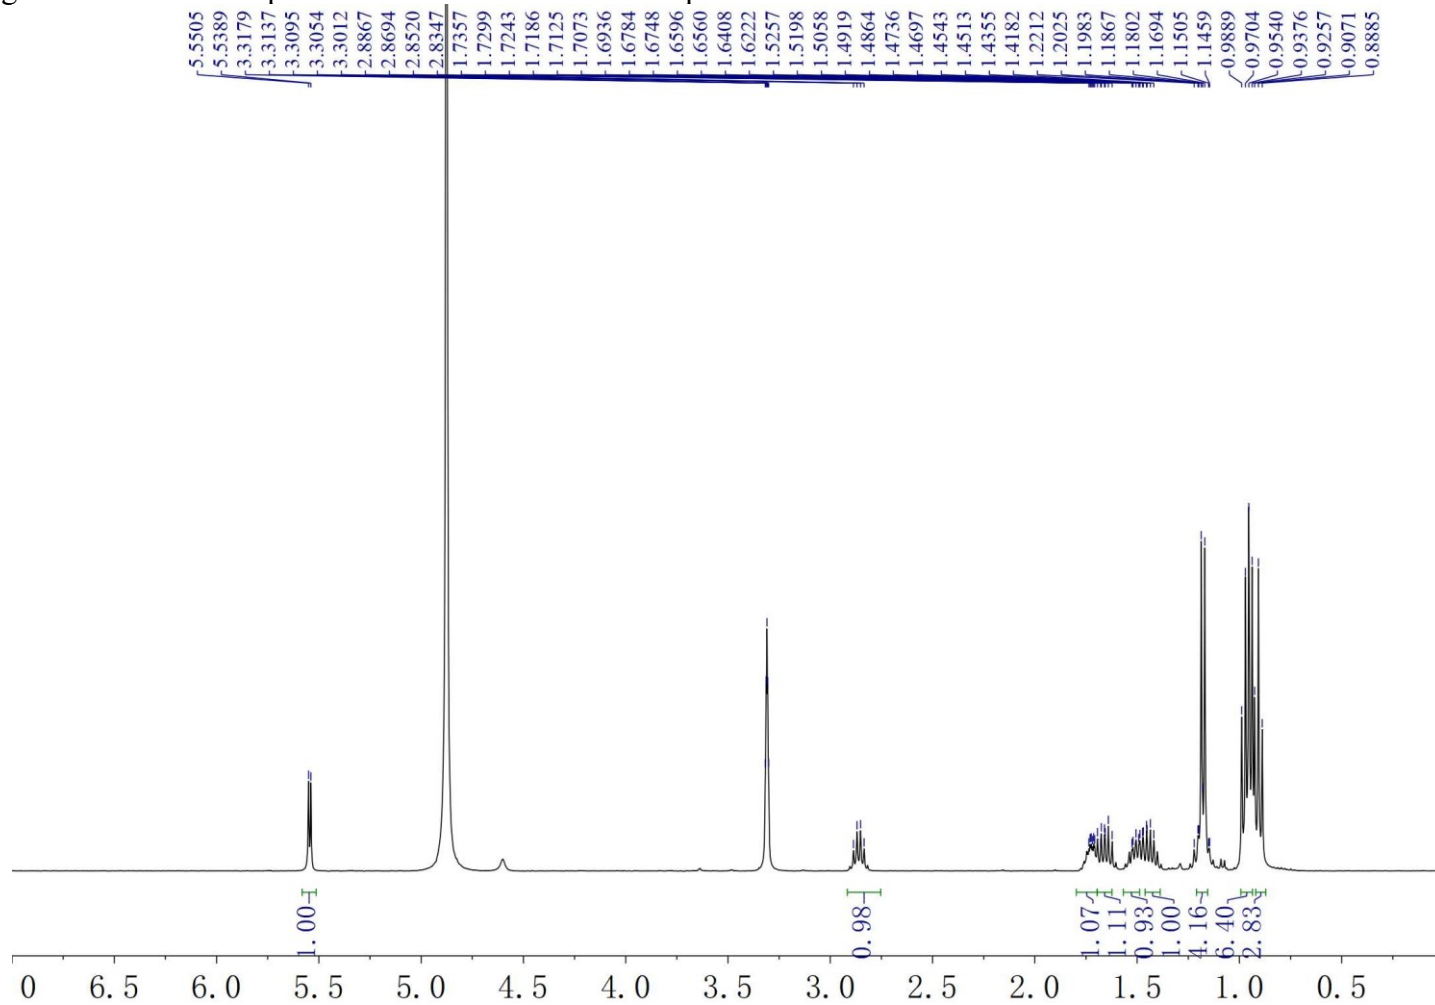

Figure S12.  $^{13}\text{C}$  NMR and DEPT spectrum in methanol- $d_4$  for Compound 2

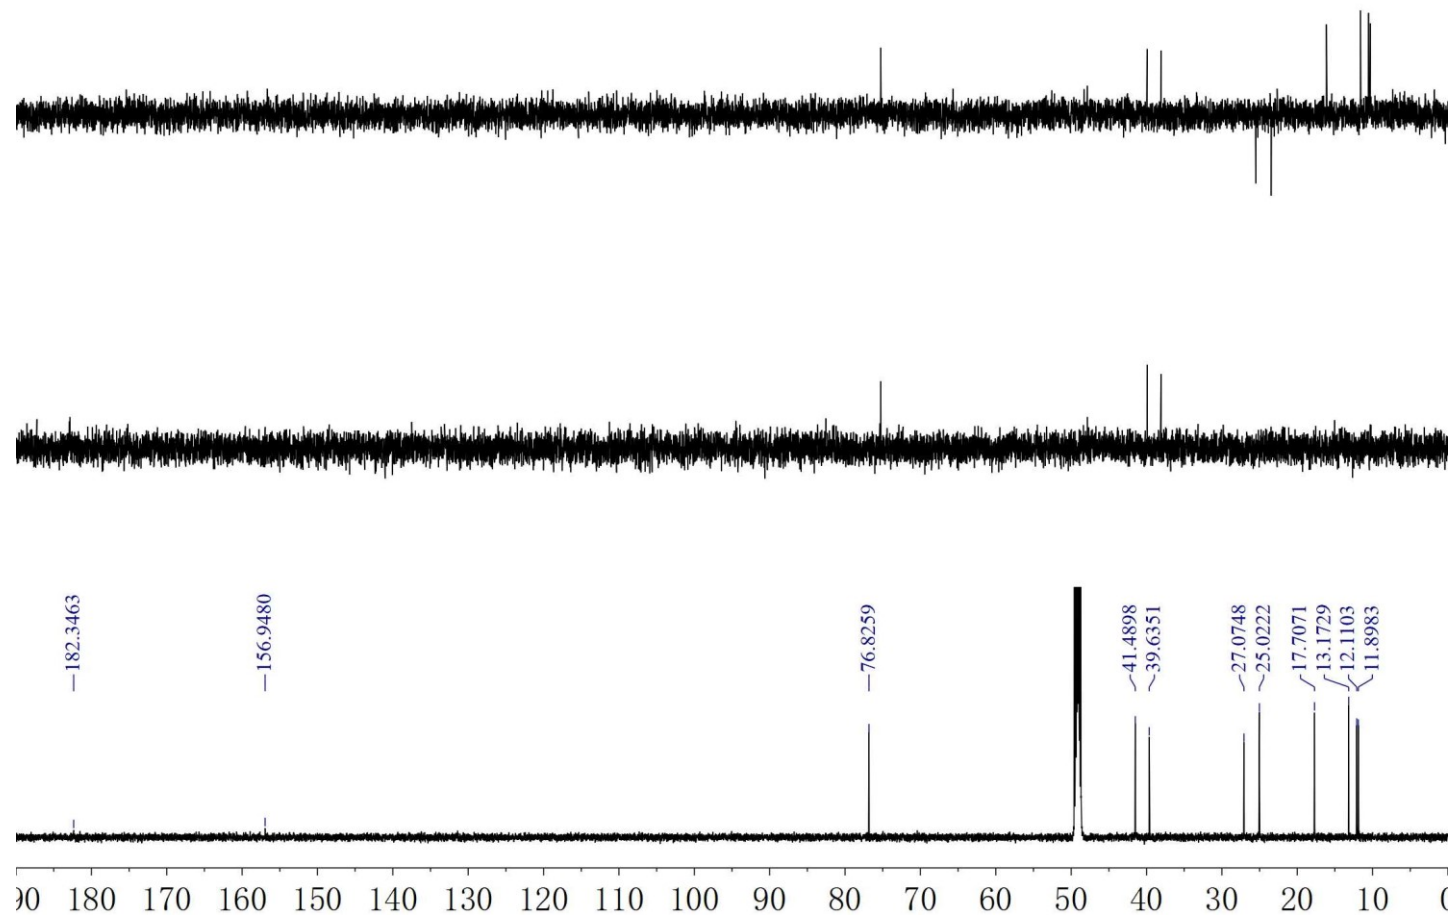

Figure S13.  $^1\text{H}$ - $^1\text{H}$  COSY spectrum in methanol- $d_4$  for Compound **2**

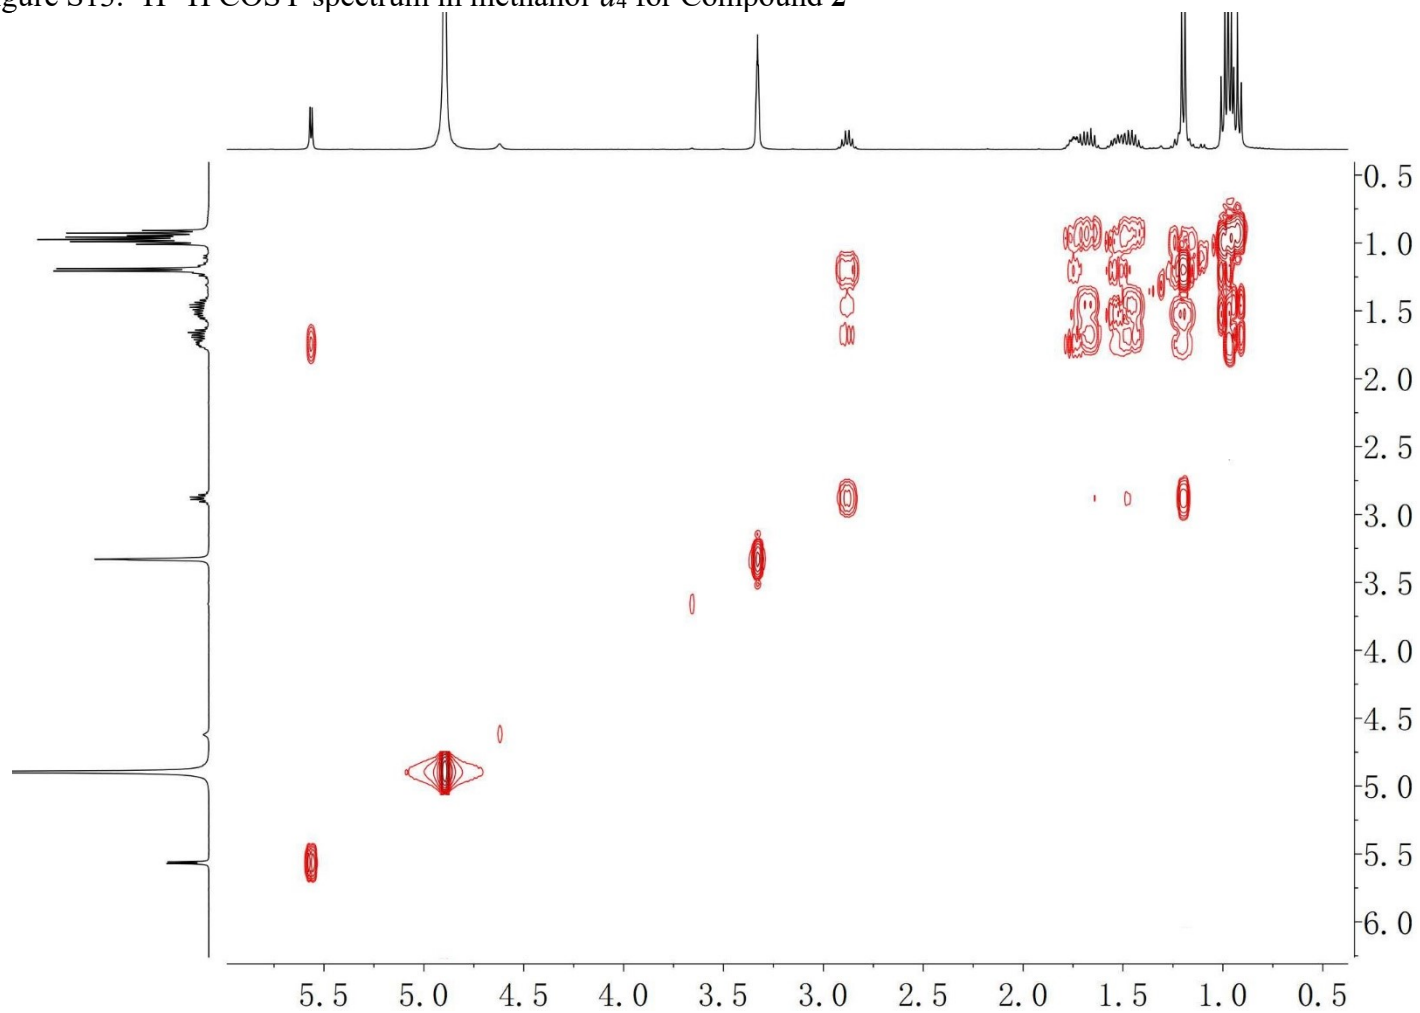



Figure S14. HSQC spectrum in methanol-*d*<sub>4</sub> for Compound 2

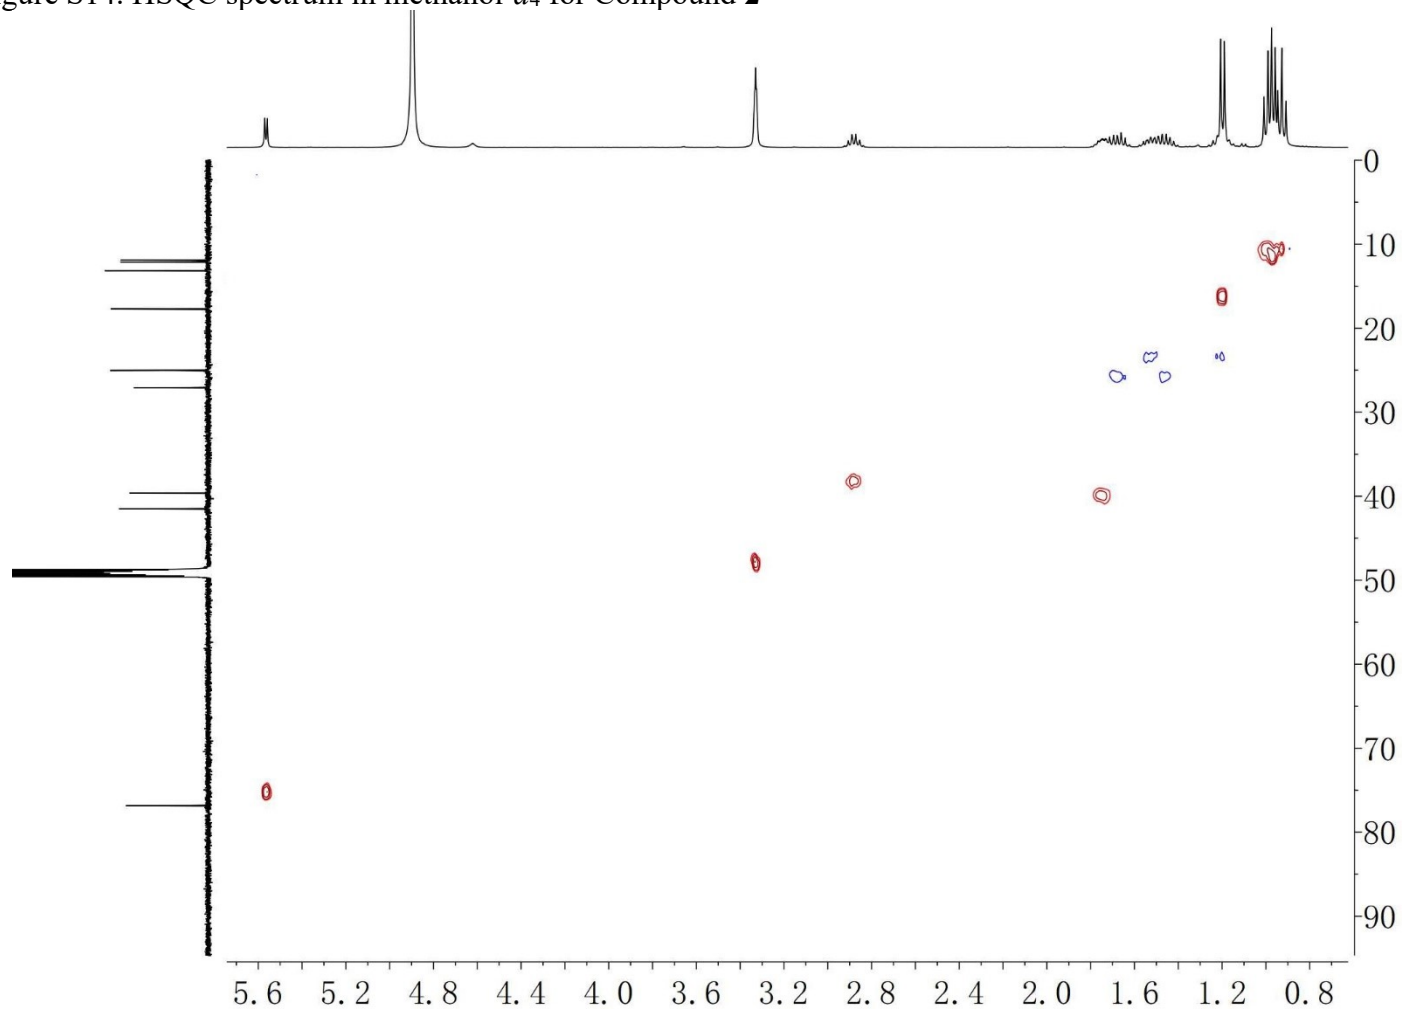

Figure S15. HMBC spectrum in methanol- $d_4$  for Compound **2**

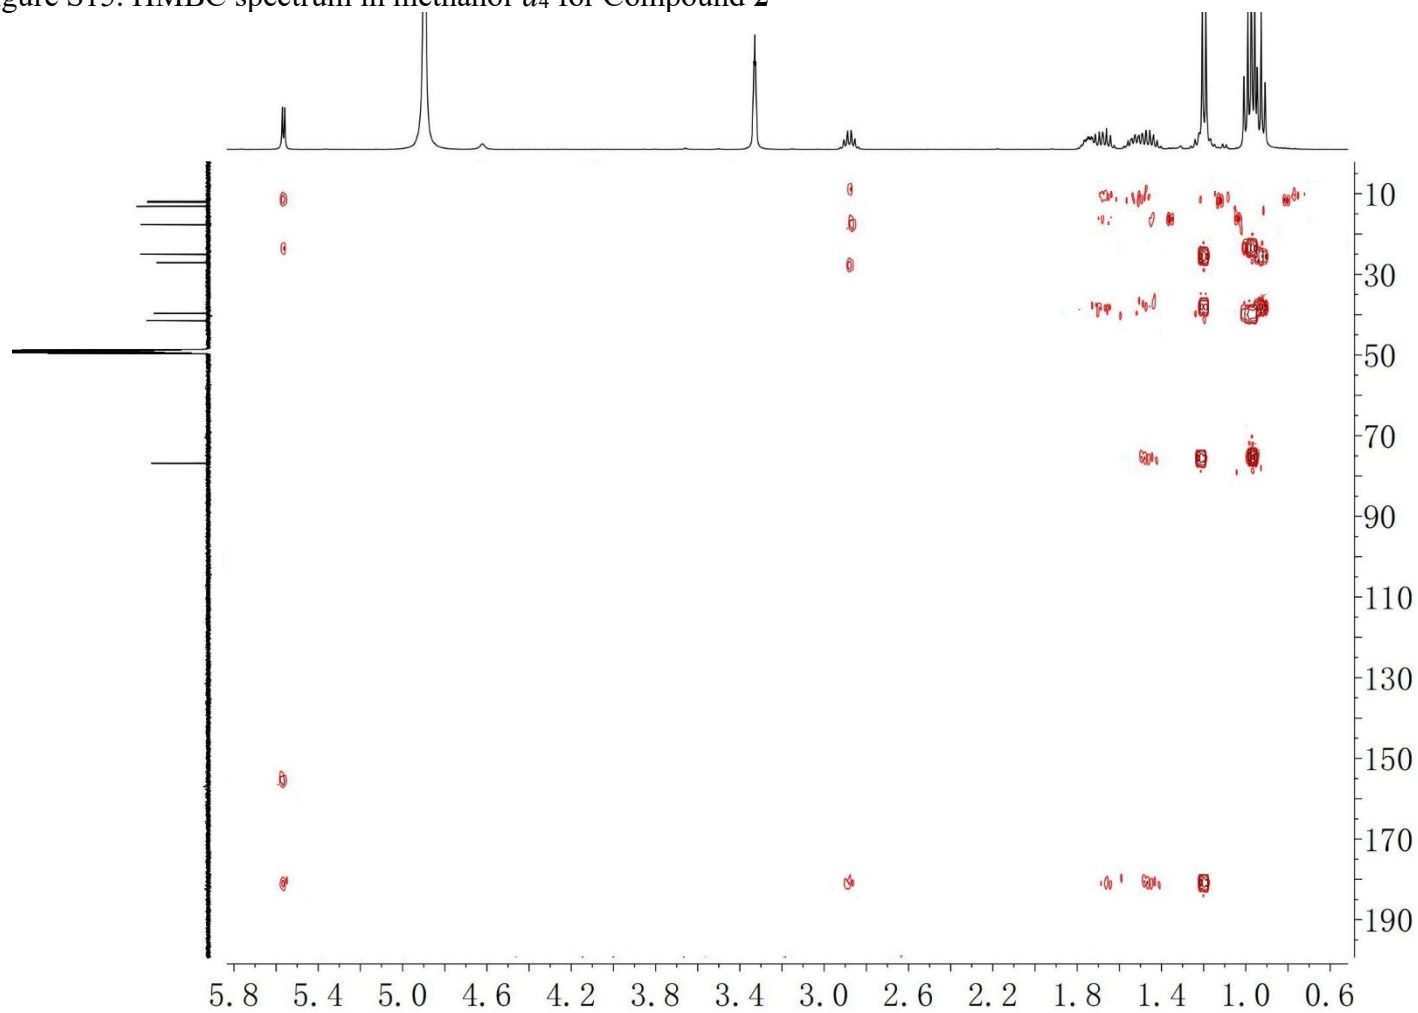

Figure S16. HRESIMS spectrum for Compound 2

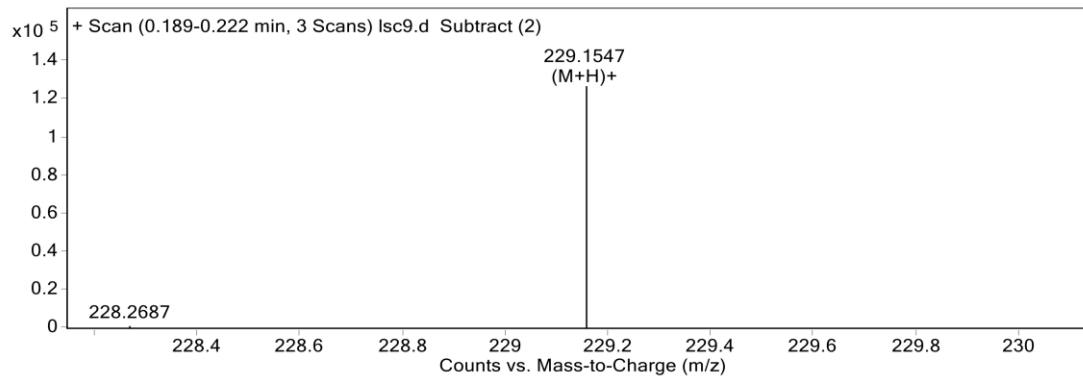

**Peak List**

| <i>m/z</i> | <i>z</i> | Abund     | Formula       | Ion    |
|------------|----------|-----------|---------------|--------|
| 86.0968    |          | 9631.73   |               |        |
| 118.0863   |          | 15697.1   |               |        |
| 130.0866   | 1        | 51371.19  |               |        |
| 229.1547   | 1        | 127253.02 | C11 H20 N2 O3 | (M+H)+ |
| 230.1579   | 1        | 17038.29  | C11 H20 N2 O3 | (M+H)+ |
| 251.1366   | 1        | 40505.64  |               |        |
| 267.1106   | 1        | 33710.73  |               |        |
| 313.1073   | 1        | 17853.14  |               |        |

**Formula Calculator Element Limits**

| Element | Min | Max |
|---------|-----|-----|
| C       | 3   | 60  |
| H       | 0   | 120 |
| O       | 0   | 30  |
| N       | 0   | 10  |

**Formula Calculator Results**

| Formula       | CalculatedMass | CalculatedMz | Mz       | Diff. (mDa) | Diff. (ppm) | DBE    |
|---------------|----------------|--------------|----------|-------------|-------------|--------|
| C11 H20 N2 O3 | 228.1474       | 229.1547     | 229.1547 | -0.1        | -0.3        | 3.0000 |

## 2. Computational details for 1 and 2

### 2.1 $^{13}\text{C}$ NMR calculation details for 1 and 2

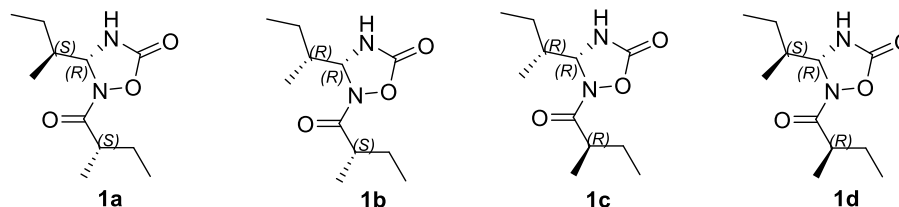

Conformation searches based on molecular mechanics with MMFF94s force field were performed for (4*R*,5*S*,2'*S*)-1 (**1a**), (4*R*,5*R*,2'*S*)-1 (**1b**), (4*R*,5*R*,2'*R*)-1 (**1c**) and (4*R*,5*S*,2'*R*)-1 (**1d**) have 15, 15, 16 and 15 conformers with populations higher than 1%, respectively<sup>1-2</sup>. All these conformers were further optimized by the density functional theory method at the B3LYP/6-31G(d) level in Gaussian 09 program package<sup>3</sup>, led to eleven (**1a1** to **1a11**), twelve (**1b1** to **1b12**), eleven (**1c1** to **1c11**) and ten (**1d1** to **1d10**) conformers within a 2.0 kcal/mol energy threshold from global minimum, respectively. These predominant conformers were subjected to NMR calculation. Gauge-Independent Atomic Orbital (GIAO) calculations of  $^{13}\text{C}$  NMR of the conformers were accomplished by density functional theory (DFT) at mPW1PW91/6-311g(d,p) level in methanol with PCM model. The  $^{13}\text{C}$  NMR chemical shift of TMS was calculated in the same level and used as reference. The calculated NMR data of these conformers were averaged according to the Boltzmann distribution theory and their relative Gibbs free energy.<sup>4</sup>

Figure S17. Optimized conformers of **1a** (**1a1-1a11**)

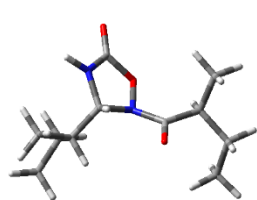

**1a1**

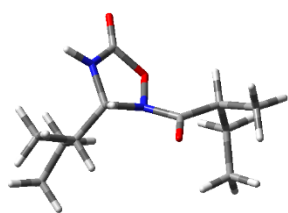

**1a2**

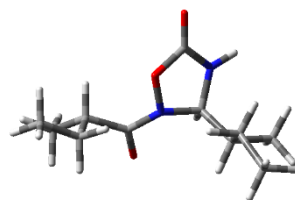

**1a3**

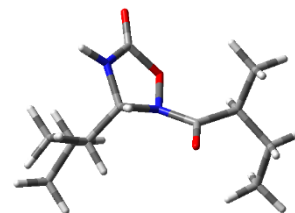

**1a4**

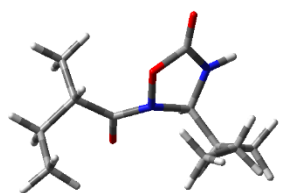

**1a5**

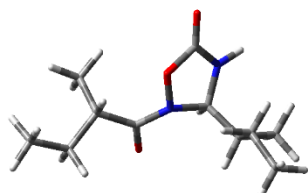

**1a6**

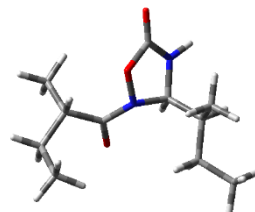

**1a7**

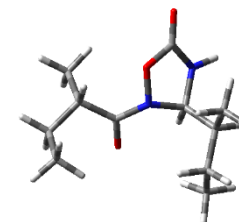

**1a8**

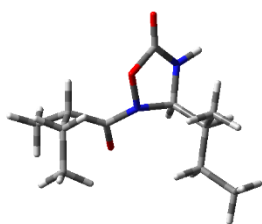

**1a9**

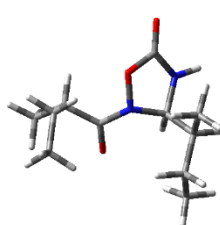

**1a10**

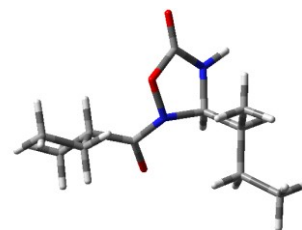

**1a11**

Table S1. Energy analysis for conformers of **1a1-1a11** at B3LYP/6-31G(d) level in the gas phase

| species     | $E'=E+ZPE$  | $E$         | $H$         | $G$         | $\Delta E$ (kcal/mol) | $P_E\%$ |
|-------------|-------------|-------------|-------------|-------------|-----------------------|---------|
| <b>1a1</b>  | -766.295543 | -766.277272 | -766.276328 | -766.342701 | 0.3495175             | 14.99%  |
| <b>1a2</b>  | -766.294309 | -766.276084 | -766.27514  | -766.34158  | 1.052945              | 4.57%   |
| <b>1a3</b>  | -766.294787 | -766.276405 | -766.275461 | -766.342587 | 0.4210525             | 13.28%  |
| <b>1a4</b>  | -766.295546 | -766.277274 | -766.27633  | -766.342706 | 0.34638               | 15.07%  |
| <b>1a5</b>  | -766.293612 | -766.275183 | -766.274239 | -766.341678 | 0.99145               | 5.07%   |
| <b>1a6</b>  | -766.294722 | -766.276177 | -766.275233 | -766.343258 | 0                     | 27.04%  |
| <b>1a7</b>  | -766.295408 | -766.27729  | -766.276346 | -766.342088 | 0.734175              | 7.83%   |
| <b>1a8</b>  | -766.295143 | -766.277123 | -766.276179 | -766.341307 | 1.2242525             | 3.42%   |
| <b>1a9</b>  | -766.294225 | -766.276172 | -766.275228 | -766.340852 | 1.509765              | 2.11%   |
| <b>1a10</b> | -766.293959 | -766.275991 | -766.275047 | -766.34034  | 1.831045              | 1.23%   |
| <b>1a11</b> | -766.294615 | -766.276479 | -766.275535 | -766.341734 | 0.95631               | 5.38%   |

$E, E', H, G$ : total energy, total energy with zero point energy (ZPE), enthalpy, and Gibbs free energy

Figure S18. Optimized conformers of **1b** (1b1-1b12).

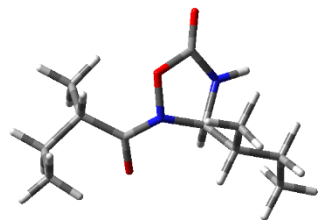

**1b1**

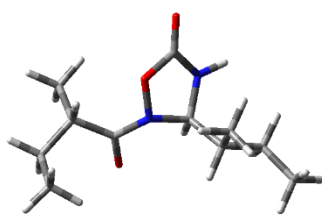

**1b2**

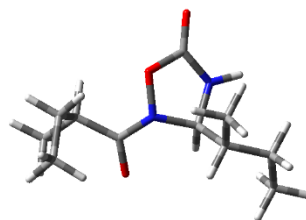

**1b3**

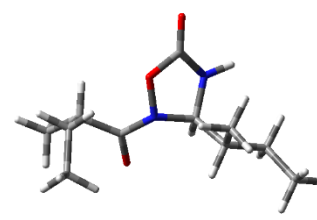

**1b4**

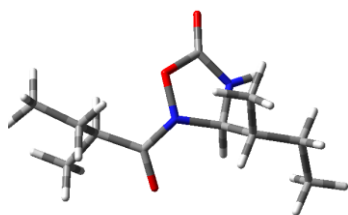

**1b5**

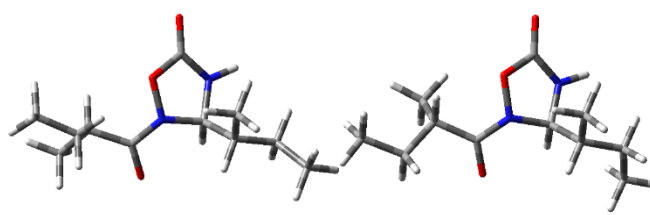

**1b6**

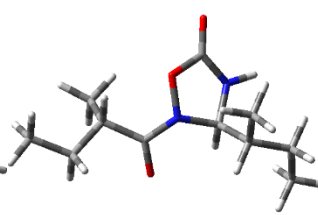

**1b7**

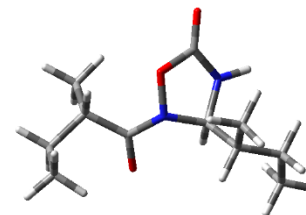

**1b8**

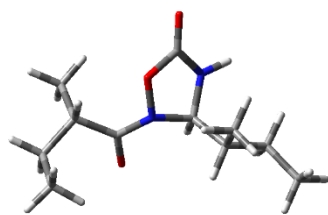

**1b9**

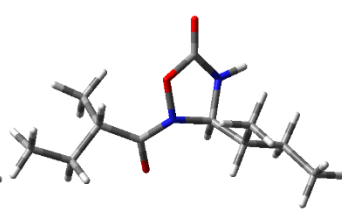

**1b10**

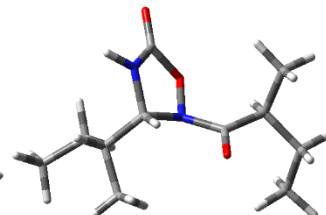

**1b11**

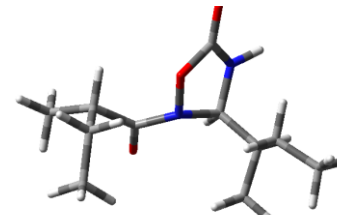

**1b12**

Table S2. Energy analysis for conformers of **1b1-1b112** at B3LYP/6-31G(d) level in the gas phase

| species     | $E'=E+ZPE$  | $E$         | $H$         | $G$         | $\Delta E$ (kcal/mol) | $P_E\%$ |
|-------------|-------------|-------------|-------------|-------------|-----------------------|---------|
| <b>1b1</b>  | -766.29451  | -766.276331 | -766.275386 | -766.341469 | 0.44176               | 10.07%  |
| <b>1b2</b>  | -766.295117 | -766.276896 | -766.275952 | -766.342173 | 0                     | 21.23%  |
| <b>1b3</b>  | -766.293086 | -766.274925 | -766.273981 | -766.340308 | 1.1702875             | 2.94%   |
| <b>1b4</b>  | -766.293651 | -766.275488 | -766.274544 | -766.340628 | 0.9694875             | 4.13%   |
| <b>1b5</b>  | -766.29363  | -766.275402 | -766.274458 | -766.340953 | 0.76555               | 5.83%   |
| <b>1b6</b>  | -766.294163 | -766.275939 | -766.274995 | -766.341401 | 0.48443               | 9.37%   |
| <b>1b7</b>  | -766.293066 | -766.274893 | -766.273949 | -766.340062 | 1.3246525             | 2.27%   |
| <b>1b8</b>  | -766.29451  | -766.276331 | -766.275387 | -766.341468 | 0.4423875             | 10.06%  |
| <b>1b9</b>  | -766.295116 | -766.276896 | -766.275952 | -766.342173 | 0                     | 21.23%  |
| <b>1b10</b> | -766.293761 | -766.275496 | -766.274552 | -766.340962 | 0.7599025             | 5.89%   |
| <b>1b11</b> | -766.294364 | -766.276308 | -766.275364 | -766.340889 | 0.80571               | 5.45%   |
| <b>1b12</b> | -766.292952 | -766.274889 | -766.273945 | -766.339684 | 1.5618475             | 1.52%   |

$E, E', H, G$ : total energy, total energy with zero point energy (ZPE), enthalpy, and Gibbs free energy



Figure S19. Optimized conformers of **1c** (**1c1-1c11**).

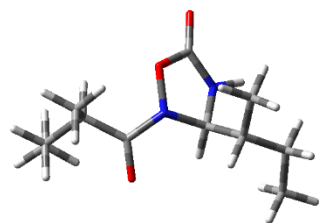

**1c1**

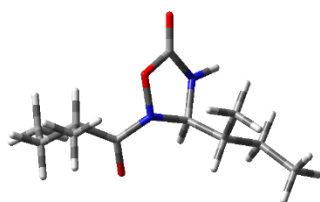

**1c2**

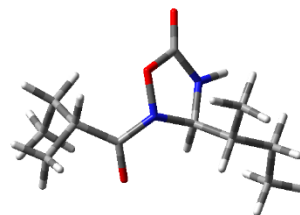

**1c3**

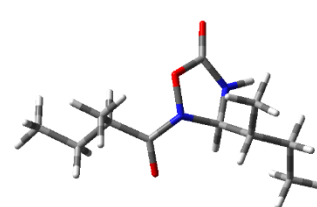

**1c4**

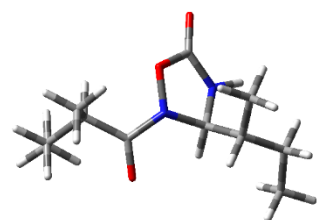

**1c5**

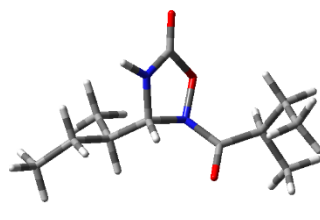

**1c6**

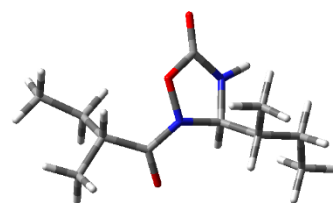

**1c7**

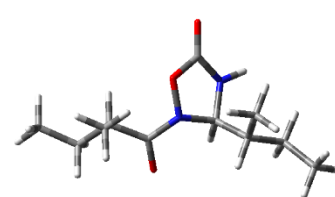

**1c8**

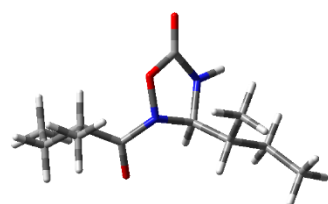

**1c9**

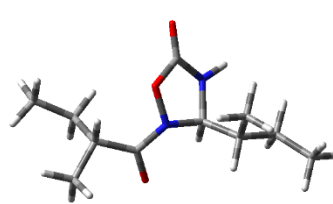

**1c10**

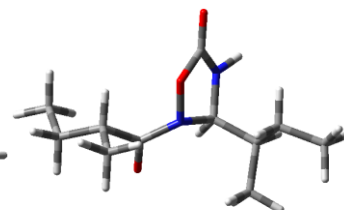

**1c11**

Table S3. Energy analysis for conformers of **1c1-1c11** at B3LYP/6-31G(d) level in the gas phase

| species     | $E'=E+ZPE$  | $E$         | $H$         | $G$         | $\Delta E$ (kcal/mol) | $P_E\%$ |
|-------------|-------------|-------------|-------------|-------------|-----------------------|---------|
| <b>1c1</b>  | -766.294863 | -766.276687 | -766.275743 | -766.294863 | 0.6093025             | 6.66%   |
| <b>1c2</b>  | -766.295448 | -766.277213 | -766.276269 | -766.295448 | 0.013805              | 18.21%  |
| <b>1c3</b>  | -766.293619 | -766.275347 | -766.274403 | -766.293619 | 1.218605              | 2.38%   |
| <b>1c4</b>  | -766.293947 | -766.275734 | -766.27479  | -766.293947 | 1.1916225             | 2.49%   |
| <b>1c5</b>  | -766.294806 | -766.276534 | -766.27559  | -766.294806 | 0.3545375             | 10.24%  |
| <b>1c6</b>  | -766.294132 | -766.275843 | -766.274899 | -766.294132 | 0.8603025             | 4.36%   |
| <b>1c7</b>  | -766.294391 | -766.276007 | -766.275062 | -766.294391 | 0.530865              | 7.61%   |
| <b>1c8</b>  | -766.294706 | -766.276311 | -766.275367 | -766.294706 | 0.2942975             | 11.34%  |
| <b>1c9</b>  | -766.295326 | -766.27702  | -766.276076 | -766.295326 | 0                     | 18.64%  |
| <b>1c10</b> | -766.294868 | -766.276498 | -766.275554 | -766.294868 | 0.2428425             | 12.37%  |
| <b>1c11</b> | -766.29498  | -766.276855 | -766.275911 | -766.29498  | 0.7021725             | 5.70%   |

$E$ ,  $E'$ ,  $H$ ,  $G$ : total energy, total energy with zero point energy (ZPE), enthalpy, and Gibbs free energy

Figure S20. Optimized conformers of **1d** (**1d1-1d10**).

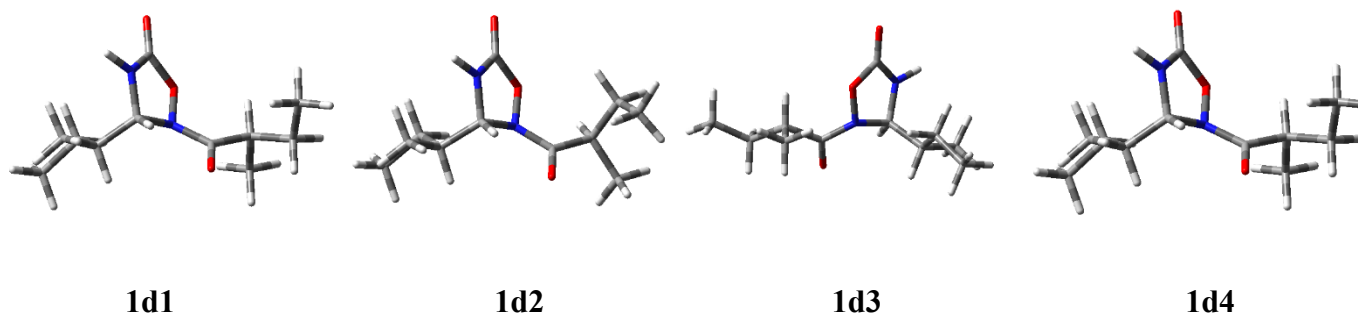

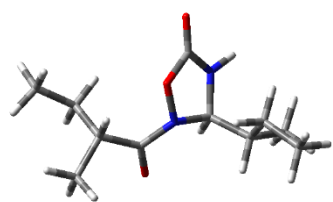

**1d5**

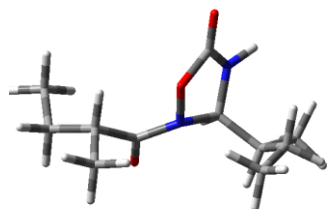

**1d6**

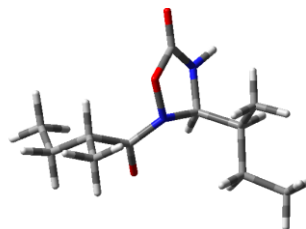

**1d7**

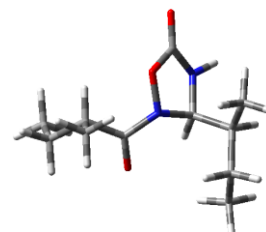

**1d8**

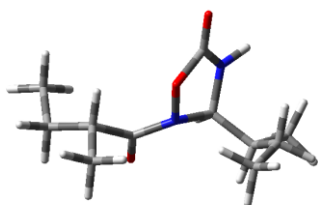

**1d9**

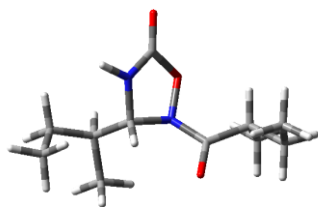

**1d10**

Table S4. Energy analysis for conformers of **1d1-1d10** at B3LYP/6-31G(d) level in the gas phase

| species     | $E'=E+ZPE$  | $E$         | $H$         | $G$         | $\Delta E$ (kcal/mol) | $P_E\%$ |
|-------------|-------------|-------------|-------------|-------------|-----------------------|---------|
| <b>1d1</b>  | -766.294565 | -766.276324 | -766.27538  | -766.342002 | 0.003765              | 22.52%  |
| <b>1d2</b>  | -766.292685 | -766.274466 | -766.273522 | -766.339987 | 1.2681775             | 2.66%   |
| <b>1d3</b>  | -766.293602 | -766.275302 | -766.274358 | -766.341223 | 0.4925875             | 9.87%   |
| <b>1d4</b>  | -766.294565 | -766.276324 | -766.27538  | -766.342008 | 0                     | 22.66%  |
| <b>1d5</b>  | -766.293854 | -766.275606 | -766.274662 | -766.341074 | 0.586085              | 8.43%   |
| <b>1d6</b>  | -766.292268 | -766.274115 | -766.273171 | -766.339484 | 1.58381               | 1.56%   |
| <b>1d7</b>  | -766.294363 | -766.276285 | -766.27534  | -766.341331 | 0.4248175             | 11.06%  |
| <b>1d8</b>  | -766.294472 | -766.27639  | -766.275446 | -766.341591 | 0.2616675             | 14.57%  |
| <b>1d9</b>  | -766.292267 | -766.274114 | -766.27317  | -766.339482 | 1.585065              | 1.56%   |
| <b>1d10</b> | -766.293361 | -766.275231 | -766.274287 | -766.340601 | 0.8828925             | 5.11%   |

$E, E', H, G$ : total energy, total energy with zero point energy (ZPE), enthalpy, and Gibbs free energy

Table S5.  $^{13}\text{C}$  NMR calculation details for **1a**

| position   | 1a1      | 1a2     | 1a3      | 1a4      | 1a5      | 1a6      | 1a7      | 1a8      | 1a9      | 1a10     | 1a11     | $\delta_{\text{calcd}}^{\text{a}}$ | $\delta_{\text{corr}}^{\text{b}}$ | $\delta_{\text{exp}}$ | Rel err <sup>c</sup> |
|------------|----------|---------|----------|----------|----------|----------|----------|----------|----------|----------|----------|------------------------------------|-----------------------------------|-----------------------|----------------------|
| C-2        | 157.6974 | 157.847 | 157.6885 | 157.692  | 157.7295 | 157.5925 | 158.9411 | 159.2487 | 158.993  | 159.1597 | 158.9253 | 157.94                             | 154.77                            | 157.12                | 2.3                  |
| C-4        | 81.0439  | 80.9179 | 80.7476  | 81.0601  | 80.2304  | 81.0068  | 80.5784  | 76.7348  | 80.5639  | 76.8973  | 80.5896  | 80.68                              | 78.13                             | 76.58                 | -1.6                 |
| C-5        | 44.9929  | 45.1351 | 45.025   | 44.9899  | 44.4336  | 44.9895  | 45.5389  | 45.105   | 45.5078  | 45.1622  | 45.5681  | 45.06                              | 42.80                             | 41.77                 | -1.0                 |
| C-8        | 14.7106  | 14.6667 | 14.6388  | 14.7147  | 20.1734  | 14.7109  | 11.2104  | 15.6158  | 11.2246  | 15.5794  | 11.1297  | 14.48                              | 12.46                             | 13.33                 | 0.9                  |
| C-6        | 24.3041  | 24.1765 | 24.2531  | 24.3066  | 27.5631  | 24.2874  | 29.3635  | 29.2929  | 29.4133  | 29.2414  | 29.4382  | 25.46                              | 23.36                             | 24.95                 | 1.6                  |
| C-7        | 13.5019  | 13.546  | 13.5944  | 13.5054  | 15.3718  | 13.5574  | 14.0956  | 13.5124  | 14.0895  | 13.5088  | 13.9657  | 13.71                              | 11.70                             | 11.71                 | 0.0                  |
| C-1'       | 185.7112 | 187.02  | 187.1561 | 185.7211 | 185.0819 | 186.2543 | 188.8407 | 189.3431 | 189.7939 | 190.3199 | 190.6545 | 186.86                             | 183.46                            | 182.45                | -1.0                 |
| C-2'       | 43.9944  | 41.802  | 43.4363  | 43.9972  | 43.9349  | 43.1683  | 44.1279  | 44.2325  | 41.921   | 42.1729  | 43.6346  | 43.53                              | 41.28                             | 39.64                 | -1.6                 |
| C-5'       | 19.9459  | 14.6849 | 14.1841  | 19.9458  | 19.9843  | 16.0037  | 19.9968  | 19.8976  | 14.736   | 14.7237  | 14.3388  | 17.40                              | 15.36                             | 15.79                 | 0.4                  |
| C-3'       | 30.3006  | 30.5551 | 32.1894  | 30.298   | 30.5819  | 28.4522  | 30.4739  | 30.3925  | 30.7084  | 30.8749  | 32.5071  | 30.23                              | 28.09                             | 28.02                 | -0.1                 |
| C-4'       | 14.347   | 9.7405  | 14.4454  | 14.3462  | 14.3065  | 13.0991  | 14.2683  | 14.306   | 9.8145   | 9.7855   | 14.4784  | 13.66                              | 11.65                             | 11.69                 | 0.0                  |
| population | 14.99%   | 4.57%   | 13.28%   | 15.07%   | 5.07%    | 27.04%   | 7.83%    | 3.42%    | 2.11%    | 1.23%    | 5.38%    |                                    |                                   |                       |                      |

<sup>a</sup> Weighted average from the calculated shifts; <sup>b</sup> Obtained by linear fit  $\delta_{\text{exp}}$  versus  $\delta_{\text{calcd}}$ ; <sup>c</sup>  $\Delta\delta = \delta_{\text{exp}} - \delta_{\text{calcd}}$

RMSD = 1.21 ppm.

Table S6.  $^1\text{H}$  NMR calculation details for **1a**

| position   | 1a1    | 1a2    | 1a3    | 1a4    | 1a5    | 1a6    | 1a7    | 1a8    | 1a9    | 1a10   | 1a11   | $\delta_{\text{calcd}}^{\text{a}}$ | $\delta_{\text{corr}}^{\text{b}}$ | $\delta_{\text{exp}}$ | Rel err <sup>c</sup> |
|------------|--------|--------|--------|--------|--------|--------|--------|--------|--------|--------|--------|------------------------------------|-----------------------------------|-----------------------|----------------------|
| H-4        | 5.6388 | 5.6491 | 5.6009 | 5.6380 | 5.6666 | 5.5687 | 5.7221 | 5.9380 | 5.7226 | 5.9308 | 5.6816 | 5.64                               | 5.60                              | 5.55                  | -0.05                |
| H-5        | 1.5572 | 1.5407 | 1.5003 | 1.5571 | 1.7681 | 1.5160 | 1.5820 | 1.5901 | 1.5770 | 1.5830 | 1.5723 | 1.55                               | 1.57                              | 1.70                  | 0.13                 |
| H-8        | 0.9579 | 0.9561 | 0.9450 | 0.9579 | 0.9370 | 0.9434 | 0.9581 | 0.9601 | 0.9497 | 0.9523 | 0.9421 | 0.95                               | 0.97                              | 0.98                  | 0.01                 |
| H-6a       | 1.1460 | 1.1392 | 1.1449 | 1.1456 | 1.3346 | 1.1373 | 1.0134 | 1.3530 | 1.0326 | 1.3453 | 0.9741 | 1.14                               | 1.16                              | 1.16                  | 0.00                 |
| H-6b       | 1.6680 | 1.6579 | 1.6442 | 1.6680 | 1.5935 | 1.6576 | 1.5354 | 1.2252 | 1.5275 | 1.2312 | 1.5096 | 1.62                               | 1.63                              | 1.53                  | -0.10                |
| H-7        | 0.9690 | 0.9730 | 0.9664 | 0.9691 | 1.0662 | 0.9658 | 0.9910 | 1.1161 | 0.9905 | 1.1204 | 0.9721 | 0.98                               | 1.00                              | 0.92                  | -0.08                |
| H-2'       | 2.7178 | 3.0784 | 2.7080 | 2.7175 | 2.7028 | 2.6281 | 2.7690 | 2.7540 | 3.1289 | 3.1606 | 2.7493 | 2.73                               | 2.73                              | 2.87                  | 0.14                 |
| H-5'       | 1.0743 | 1.0472 | 1.0128 | 1.0745 | 1.0721 | 1.0573 | 1.0564 | 1.0736 | 1.0373 | 1.0554 | 0.9981 | 1.05                               | 1.08                              | 1.08                  | 0.00                 |
| H-3a'      | 1.3467 | 2.0076 | 1.3068 | 1.3467 | 1.3510 | 1.5684 | 1.3568 | 1.3608 | 1.9878 | 1.9905 | 1.2967 | 1.45                               | 1.47                              | 1.53                  | 0.06                 |
| H-3b'      | 1.8505 | 1.5898 | 1.8971 | 1.8503 | 1.8602 | 1.5273 | 1.8338 | 1.8734 | 1.6017 | 1.6262 | 1.9144 | 1.75                               | 1.76                              | 1.66                  | -0.10                |
| H-4'       | 0.8889 | 0.8262 | 1.0615 | 0.8889 | 0.8743 | 0.9952 | 0.8754 | 0.8998 | 0.8238 | 0.8447 | 1.0574 | 0.94                               | 0.97                              | 0.95                  | -0.02                |
| population | 14.99% | 4.57%  | 13.28% | 15.07% | 5.07%  | 27.04% | 7.83%  | 3.42%  | 2.11%  | 1.23%  | 5.38%  |                                    |                                   |                       |                      |

RMSD = 0.08 ppm.

Table S7.  $^{13}\text{C}$  NMR calculation details for **1b**

| position   | 1b1      | 1b2      | 1b3      | 1b4      | 1b5      | 1b6      | 1b7      | 1b8      | 1b9      | 1b10     | 1b11     | 1b12     | $\delta_{\text{calcd}}$ |
|------------|----------|----------|----------|----------|----------|----------|----------|----------|----------|----------|----------|----------|-------------------------|
| C-2        | 159.142  | 158.8523 | 159.0056 | 158.7956 | 158.9038 | 158.5735 | 159.0914 | 159.1443 | 158.8605 | 158.671  | 159.6656 | 159.6054 | 158.94                  |
| C-4        | 75.8383  | 80.2142  | 75.9886  | 80.277   | 76.0088  | 80.3281  | 75.7709  | 75.8457  | 80.2137  | 80.0873  | 79.8239  | 80.1166  | 78.85                   |
| C-5        | 44.7983  | 45.4359  | 44.8243  | 45.5317  | 44.6172  | 45.3158  | 44.76    | 44.7986  | 45.4391  | 45.394   | 45.2945  | 45.3476  | 45.21                   |
| C-8        | 15.2613  | 11.0313  | 15.2021  | 11.1028  | 15.0779  | 11.0298  | 15.2761  | 15.261   | 11.031   | 11.1008  | 16.0849  | 16.108   | 12.70                   |
| C-6        | 29.1447  | 28.1547  | 29.0424  | 28.2219  | 29.1124  | 28.2937  | 29.0192  | 29.1452  | 28.1543  | 28.137   | 24.1186  | 24.147   | 28.19                   |
| C-7        | 13.4964  | 14.0611  | 13.3919  | 14.0776  | 13.3275  | 14.0753  | 13.3913  | 13.4959  | 14.0609  | 14.0655  | 13.6022  | 13.597   | 13.84                   |
| C-1'       | 187.4162 | 187.0725 | 188.3943 | 187.9661 | 188.9167 | 188.3185 | 187.9669 | 187.4317 | 187.1021 | 187.4699 | 189.2422 | 190.255  | 187.66                  |
| C-2'       | 44.229   | 44.0154  | 42.0898  | 42.2465  | 43.5151  | 43.5623  | 43.1533  | 44.2282  | 44.0131  | 43.0757  | 44.2739  | 42.2172  | 43.77                   |
| C-5'       | 19.9382  | 19.8905  | 14.7456  | 14.6061  | 14.2473  | 14.3721  | 16.1021  | 19.942   | 19.8917  | 16.1425  | 20.0347  | 14.7154  | 18.31                   |
| C-3'       | 30.4742  | 30.4502  | 30.7709  | 30.914   | 32.4502  | 32.3443  | 28.6609  | 30.4747  | 30.4586  | 28.732   | 30.5734  | 30.4946  | 30.65                   |
| C-4'       | 14.2815  | 14.3271  | 9.8604   | 9.7807   | 14.395   | 14.4671  | 12.9024  | 14.2819  | 14.3261  | 13.0122  | 14.337   | 9.8933   | 13.84                   |
| population | 10.07%   | 21.23%   | 2.94%    | 4.13%    | 5.83%    | 9.37%    | 2.27%    | 10.06%   | 21.23%   | 5.89%    | 5.45%    | 1.52%    |                         |

Table S8.  $^1\text{H}$  NMR calculation details for **1b**

| position   | 1b1    | 1b2    | 1b3    | 1b4    | 1b5    | 1b6    | 1b7    | 1b8    | 1b9    | 1b10   | 1b11   | 1b12   | $\delta_{\text{calcd}}$ |
|------------|--------|--------|--------|--------|--------|--------|--------|--------|--------|--------|--------|--------|-------------------------|
| H-4        | 6.0131 | 5.6707 | 6.0066 | 5.6769 | 5.9457 | 5.6270 | 5.9450 | 6.0131 | 5.6708 | 5.6205 | 5.7379 | 5.7362 | 5.77                    |
| H-5        | 1.6449 | 1.5487 | 1.6268 | 1.5362 | 1.5892 | 1.4960 | 1.6054 | 1.6444 | 1.5486 | 1.5062 | 1.6272 | 1.6315 | 1.57                    |
| H-8        | 0.9777 | 0.9668 | 0.9682 | 0.9594 | 0.9574 | 0.9443 | 0.9729 | 0.9777 | 0.9669 | 0.9624 | 0.9172 | 0.9177 | 0.96                    |
| H-6a       | 1.2193 | 1.5209 | 1.2246 | 1.5279 | 1.2185 | 1.5233 | 1.2262 | 1.2193 | 1.5209 | 1.5032 | 1.6209 | 1.6166 | 1.43                    |
| H-6b       | 1.4909 | 1.0524 | 1.4910 | 1.0531 | 1.4834 | 1.0597 | 1.4915 | 1.4908 | 1.0523 | 1.0489 | 1.0691 | 1.0696 | 1.19                    |
| H-7        | 1.0481 | 1.0154 | 1.0625 | 1.0214 | 1.0498 | 1.0071 | 1.0357 | 1.0481 | 1.0154 | 1.0125 | 0.9919 | 0.9889 | 1.02                    |
| H-2'       | 2.7458 | 2.7385 | 3.1071 | 3.1035 | 2.7641 | 2.7433 | 2.6973 | 2.7458 | 2.7391 | 2.6675 | 2.7782 | 3.1256 | 2.77                    |
| H-5'       | 1.0858 | 1.0728 | 1.0617 | 1.0526 | 1.0278 | 1.0185 | 1.0641 | 1.0858 | 1.0727 | 1.0586 | 1.0614 | 1.0317 | 1.06                    |
| H-3a'      | 1.3826 | 1.3762 | 2.0389 | 2.0331 | 1.3256 | 1.3094 | 1.6040 | 1.3827 | 1.3766 | 1.5954 | 1.3781 | 2.0319 | 1.44                    |
| H-3b'      | 1.8731 | 1.8740 | 1.6073 | 1.6223 | 1.9170 | 1.9278 | 1.5352 | 1.8735 | 1.8740 | 1.5384 | 1.8436 | 1.6067 | 1.83                    |
| H-4'       | 0.8969 | 0.8957 | 0.8287 | 0.8230 | 1.0632 | 1.0662 | 0.9982 | 0.8970 | 0.8957 | 0.9935 | 0.8870 | 0.8280 | 0.92                    |
| population | 10.07% | 21.23% | 2.94%  | 4.13%  | 5.83%  | 9.37%  | 2.27%  | 10.06% | 21.23% | 5.89%  | 5.45%  | 1.52%  |                         |

Table S9. <sup>13</sup>C NMR calculation details for **1c**

| position   | 1c1      | 1c2      | 1c3      | 1c4      | 1c5      | 1c6      | 1c7      | 1c8      | 1c9      | 1c10     | 1c11     | $\delta_{\text{calcd}}^a$ | $\delta_{\text{corr}}^b$ | $\delta_{\text{exp}}$ | Rel err <sup>c</sup> |
|------------|----------|----------|----------|----------|----------|----------|----------|----------|----------|----------|----------|---------------------------|--------------------------|-----------------------|----------------------|
| C-2        | 158.0317 | 157.8739 | 158.0516 | 158.2118 | 157.981  | 157.7878 | 158.0237 | 157.8501 | 157.5636 | 157.5457 | 159.0533 | 157.88                    | 154.70                   | 156.96                | 2.3                  |
| C-4        | 76.4889  | 81.0024  | 76.4565  | 76.5655  | 75.9717  | 81.112   | 76.3383  | 80.9738  | 80.5332  | 81.1573  | 80.2472  | 79.50                     | 76.90                    | 76.78                 | -0.1                 |
| C-5        | 44.9997  | 45.2239  | 44.6439  | 44.9857  | 44.5993  | 44.8905  | 44.8253  | 45.2647  | 44.8848  | 44.8998  | 45.3146  | 44.99                     | 42.64                    | 41.44                 | -1.2                 |
| C-8        | 15.2652  | 11.1166  | 15.1084  | 15.2991  | 15.1987  | 11.0434  | 15.1705  | 11.1503  | 11.071   | 11.0108  | 16.1721  | 12.59                     | 10.48                    | 13.12                 | 2.6                  |
| C-6        | 29.0584  | 28.2512  | 29.0359  | 29.0855  | 29.0309  | 28.1953  | 29.0172  | 28.2119  | 28.1806  | 28.1064  | 24.188   | 28.21                     | 25.99                    | 24.97                 | -1.0                 |
| C-7        | 13.4596  | 14.1095  | 13.4648  | 13.4626  | 13.4856  | 14.2083  | 13.5098  | 14.1311  | 14.1612  | 14.1921  | 13.6414  | 13.93                     | 11.81                    | 12.06                 | 0.2                  |
| C-1'       | 187.0554 | 186.9477 | 184.5299 | 188.9152 | 187.8637 | 184.3705 | 185.883  | 187.8974 | 186.8529 | 185.0963 | 190.5055 | 186.91                    | 183.52                   | 182.20                | -1.3                 |
| C-2'       | 43.5512  | 43.498   | 41.3059  | 43.3945  | 42.2     | 41.5038  | 42.8825  | 43.364   | 42.4535  | 42.8965  | 43.7207  | 42.91                     | 40.58                    | 39.58                 | -1.0                 |
| C-5'       | 22.5166  | 22.4471  | 15.8761  | 18.5575  | 22.1147  | 15.8669  | 15.2735  | 18.4715  | 22.1404  | 15.172   | 22.8493  | 19.95                     | 17.79                    | 17.65                 | -0.1                 |
| C-3'       | 29.0651  | 28.9573  | 28.2657  | 27.4401  | 32.252   | 28.2558  | 29.3463  | 27.2906  | 31.7692  | 29.3449  | 29.0459  | 29.63                     | 27.41                    | 27.02                 | -0.4                 |
| C-4'       | 14.5959  | 14.5624  | 9.8013   | 12.9445  | 14.6143  | 9.8227   | 13.965   | 13.0649  | 14.5873  | 13.978   | 14.4993  | 13.92                     | 11.81                    | 11.84                 | 0.0                  |
| population | 6.66%    | 18.21%   | 2.38%    | 2.49%    | 10.24%   | 4.36%    | 7.61%    | 11.34%   | 18.64%   | 12.37%   | 5.70%    |                           |                          |                       |                      |

<sup>a</sup> Weighted average from the calculated shifts; <sup>b</sup> Obtained by linear fit  $\delta_{\text{exp}}$  versus  $\delta_{\text{calcd}}$ ; <sup>c</sup>  $\Delta\delta = \delta_{\text{exp}} - \delta_{\text{calcd}}$

RMSD = 1.26 ppm.

Table S10. <sup>1</sup>H NMR calculation details for **1c**

| position   | 1c1    | 1c2    | 1c3    | 1c4    | 1c5    | 1c6    | 1c7    | 1c8    | 1c9    | 1c10   | 1c11   | $\delta_{\text{calcd}}^a$ | $\delta_{\text{corr}}^b$ | $\delta_{\text{exp}}$ | Rel err <sup>c</sup> |
|------------|--------|--------|--------|--------|--------|--------|--------|--------|--------|--------|--------|---------------------------|--------------------------|-----------------------|----------------------|
| H-4        | 5.9736 | 5.6350 | 5.9731 | 5.9380 | 6.0548 | 5.6407 | 5.9434 | 5.5993 | 5.6991 | 5.5751 | 5.7345 | 5.75                      | 5.60                     | 5.55                  | -0.05                |
| H-5        | 1.6284 | 1.5401 | 1.6215 | 1.6003 | 1.6261 | 1.5653 | 1.6077 | 1.5137 | 1.5600 | 1.5644 | 1.5863 | 1.57                      | 1.59                     | 1.74                  | 0.15                 |
| H-8        | 0.9717 | 0.9635 | 0.9688 | 0.9822 | 0.9771 | 0.9520 | 0.9719 | 0.9637 | 0.9589 | 0.9548 | 0.9126 | 0.96                      | 1.01                     | 0.95                  | -0.06                |
| H-6a       | 1.4862 | 1.0457 | 1.4707 | 1.4751 | 1.4674 | 1.0269 | 1.4601 | 1.0361 | 1.0343 | 1.0137 | 1.0813 | 1.16                      | 1.20                     | 1.20                  | 0.00                 |
| H-6b       | 1.2135 | 1.5072 | 1.2124 | 1.2114 | 1.2254 | 1.4984 | 1.2064 | 1.4854 | 1.4920 | 1.4727 | 1.6534 | 1.42                      | 1.45                     | 1.51                  | 0.06                 |
| H-7        | 1.0654 | 1.0129 | 1.0575 | 1.0527 | 1.0576 | 1.0027 | 1.0405 | 1.0160 | 1.0122 | 1.0074 | 0.9923 | 1.02                      | 1.07                     | 0.97                  | -0.10                |
| H-2'       | 2.7607 | 2.7782 | 3.0283 | 2.6571 | 2.9907 | 3.0190 | 2.6880 | 2.6366 | 2.9658 | 2.6724 | 2.8653 | 2.82                      | 2.79                     | 2.87                  | 0.08                 |
| H-5'       | 1.2318 | 1.2371 | 1.1295 | 1.2346 | 1.1862 | 1.1386 | 1.1115 | 1.2378 | 1.1868 | 1.1063 | 1.2307 | 1.19                      | 1.23                     | 1.18                  | -0.05                |
| H-3a'      | 1.2775 | 1.2768 | 1.8187 | 1.4005 | 1.4196 | 1.8405 | 1.1486 | 1.3904 | 1.4051 | 1.1458 | 1.2751 | 1.34                      | 1.38                     | 1.46                  | 0.08                 |
| H-3b'      | 1.8376 | 1.8418 | 1.5215 | 1.5605 | 1.7254 | 1.5140 | 1.6262 | 1.5525 | 1.7262 | 1.6361 | 1.8283 | 1.70                      | 1.72                     | 1.65                  | -0.07                |
| H-4'       | 0.8587 | 0.8474 | 0.8268 | 0.9729 | 0.8583 | 0.8272 | 1.0279 | 0.9706 | 0.8539 | 1.0216 | 0.8194 | 0.90                      | 0.95                     | 0.91                  | -0.04                |
| population | 6.66%  | 18.21% | 2.38%  | 2.49%  | 10.24% | 4.36%  | 7.61%  | 11.34% | 18.64% | 12.37% | 5.70%  |                           |                          |                       |                      |

RMSD = 0.08 ppm.

Table S11.  $^{13}\text{C}$  NMR calculation details for **1d**

| position   | 1d1      | 1d2      | 1d3      | 1d4      | 1d5      | 1d6      | 1d7      | 1d8      | 1d9      | 1d10     | $\delta_{\text{caled}}$ |
|------------|----------|----------|----------|----------|----------|----------|----------|----------|----------|----------|-------------------------|
| C-2        | 158.5461 | 158.5285 | 158.5013 | 158.5445 | 158.7182 | 159.1195 | 159.5593 | 159.7103 | 159.1223 | 159.4508 | 158.90                  |
| C-4        | 80.0505  | 80.0754  | 80.0871  | 80.0564  | 80.1262  | 79.2774  | 80.0924  | 76.0856  | 79.2772  | 77.4499  | 79.33                   |
| C-5        | 45.1223  | 45.1464  | 45.0522  | 45.1206  | 45.07    | 44.8885  | 45.6918  | 45.5635  | 44.886   | 41.9112  | 45.07                   |
| C-8        | 14.5811  | 14.6628  | 14.6389  | 14.5814  | 14.6008  | 19.8366  | 11.2869  | 15.5153  | 19.8357  | 15.5955  | 14.58                   |
| C-6        | 24.2763  | 24.2585  | 24.157   | 24.2748  | 24.1934  | 26.977   | 29.2863  | 29.1881  | 26.9751  | 27.0669  | 25.75                   |
| C-7        | 13.4563  | 13.4791  | 13.4367  | 13.4547  | 13.4193  | 15.7483  | 13.9549  | 13.6022  | 15.7492  | 8.0149   | 13.32                   |
| C-1'       | 188.112  | 185.1593 | 188.9162 | 188.1177 | 186.6962 | 187.8457 | 190.441  | 190.7354 | 187.8374 | 190.4062 | 188.74                  |
| C-2'       | 43.0152  | 41.4734  | 43.3061  | 43.0168  | 43.1346  | 43.1661  | 43.5683  | 43.7351  | 43.1684  | 43.6516  | 43.22                   |
| C-5'       | 22.7835  | 15.913   | 18.7259  | 22.7827  | 15.2024  | 22.2194  | 23.094   | 23.0764  | 22.217   | 22.9393  | 21.63                   |
| C-3'       | 29.5594  | 28.2116  | 27.334   | 29.5597  | 29.4414  | 29.2895  | 29.2301  | 29.117   | 29.2934  | 29.1879  | 29.17                   |
| C-4'       | 14.5581  | 9.6921   | 12.7599  | 14.557   | 13.973   | 14.521   | 14.4872  | 14.4915  | 14.5221  | 14.5792  | 14.18                   |
| population | 22.52%   | 2.66%    | 9.87%    | 22.66%   | 8.43%    | 1.56%    | 11.06%   | 14.57%   | 1.56%    | 5.11%    |                         |

Table S12.  $^1\text{H}$  NMR calculation details for **1d**

| position   | 1d1    | 1d2    | 1d3    | 1d4    | 1d5    | 1d6    | 1d7    | 1d8    | 1d9    | 1d10   | $\delta_{\text{caled}}$ |
|------------|--------|--------|--------|--------|--------|--------|--------|--------|--------|--------|-------------------------|
| H-4        | 5.6925 | 5.6719 | 5.6419 | 5.6921 | 5.6365 | 5.7218 | 5.7417 | 5.9571 | 5.7219 | 5.6004 | 5.72                    |
| H-5        | 1.5237 | 1.5037 | 1.4953 | 1.5236 | 1.5107 | 1.7037 | 1.6299 | 1.6318 | 1.7038 | 1.9513 | 1.57                    |
| H-8        | 0.9676 | 0.9637 | 0.9576 | 0.9675 | 0.9519 | 0.9465 | 0.9415 | 0.9570 | 0.9465 | 0.9368 | 0.96                    |
| H-6a       | 1.1506 | 1.1286 | 1.1355 | 1.1505 | 1.1354 | 1.3363 | 0.9821 | 1.3441 | 1.3362 | 1.6584 | 1.19                    |
| H-6b       | 1.6594 | 1.6480 | 1.6668 | 1.6594 | 1.6716 | 1.5666 | 1.5134 | 1.1723 | 1.5665 | 1.5411 | 1.56                    |
| H-7        | 0.9780 | 0.9739 | 0.9682 | 0.9779 | 0.9628 | 1.0970 | 0.9798 | 1.1216 | 1.0969 | 0.8951 | 1.00                    |
| H-2'       | 2.9129 | 3.0308 | 2.6722 | 2.9126 | 2.6816 | 2.8626 | 2.9361 | 2.9275 | 2.8625 | 2.8954 | 2.87                    |
| H-5'       | 1.2315 | 1.1451 | 1.2447 | 1.2317 | 1.1150 | 1.2112 | 1.2349 | 1.2614 | 1.2111 | 1.2544 | 1.23                    |
| H-3a'      | 1.8473 | 1.5273 | 1.5439 | 1.8473 | 1.6346 | 1.8466 | 1.8301 | 1.8512 | 1.8472 | 1.8508 | 1.79                    |
| H-3b'      | 1.3052 | 1.8064 | 1.4130 | 1.3051 | 1.1188 | 1.3005 | 1.3043 | 1.3161 | 1.3004 | 1.2998 | 1.31                    |
| H-4'       | 0.8200 | 0.8180 | 0.9658 | 0.8201 | 1.0219 | 0.8256 | 0.8108 | 0.8368 | 0.8255 | 0.8458 | 0.85                    |
| population | 22.52% | 2.66%  | 9.87%  | 22.66% | 8.43%  | 1.56%  | 11.06% | 14.57% | 1.56%  | 5.11%  |                         |



Figure S21. Left: Regression analysis of experimental versus calculated  $^{13}\text{C}$  NMR chemical shifts of **1** at mPW1PW91/6-311g(d,p) level; linear fitting was shown as a line; Right: Relative chemical shift errors between scaled  $^{13}\text{C}$  NMR and experimental  $^{13}\text{C}$  NMR for **1** ( $\delta_{\text{corr}}$  obtained by linear fit  $\delta_{\text{exp}}$  versus  $\delta_{\text{calcd}}$ ).

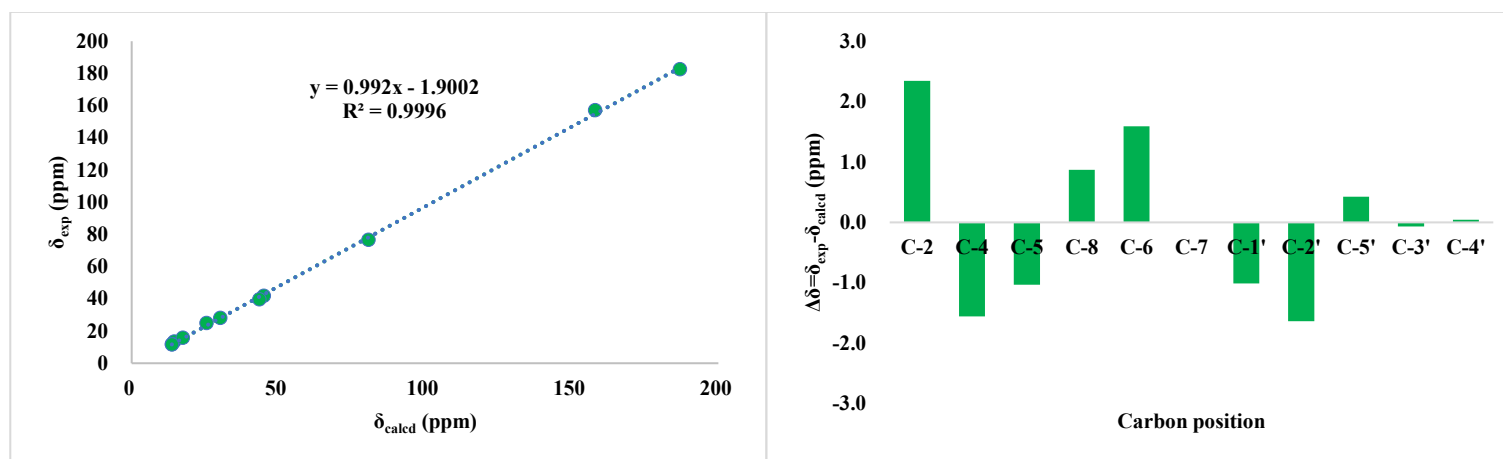

Figure S22. Left: Regression analysis of experimental versus calculated  $^1\text{H}$  NMR chemical shifts of **1** at mPW1PW91/6-311g(d,p) level; linear fitting was shown as a line; Right: Relative chemical shift errors between scaled  $^1\text{H}$  NMR and experimental  $^1\text{H}$  NMR for **1** ( $\delta_{\text{corr}}$  obtained by linear fit  $\delta_{\text{exp}}$  versus  $\delta_{\text{calcd}}$ ).

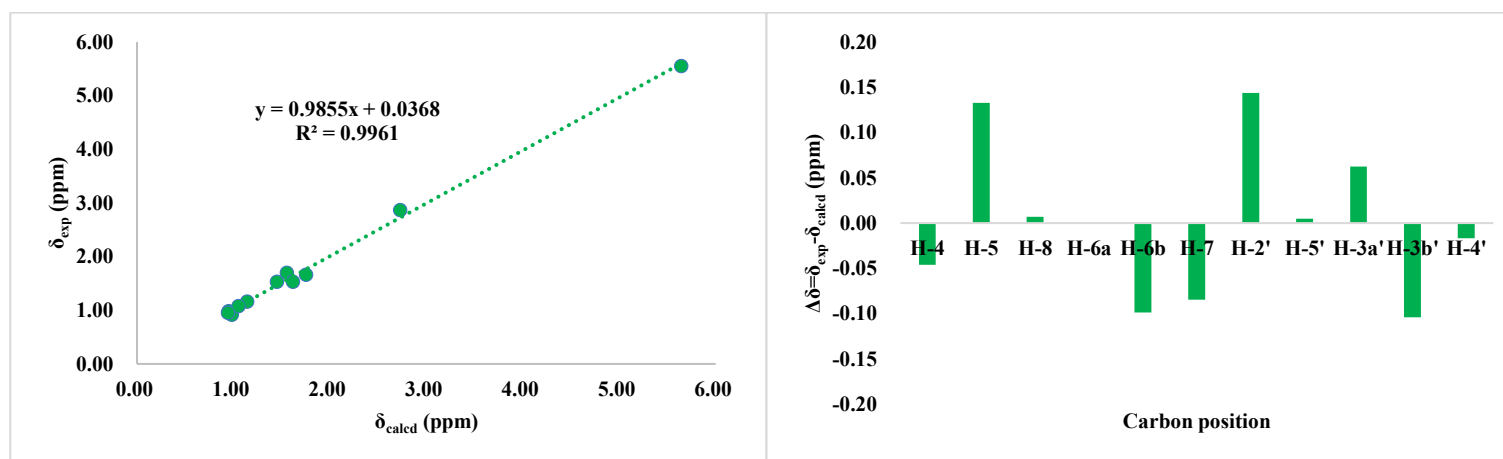

Figure S23. Left: Regression analysis of experimental versus calculated  $^{13}\text{C}$  NMR chemical shifts of **2** at mPW1PW91/6-311g(d,p) level; linear fitting was shown as a line; Right: Relative chemical shift errors between scaled  $^{13}\text{C}$  NMR and experimental  $^{13}\text{C}$  NMR for **2** ( $\delta_{\text{corr}}$  obtained by linear fit  $\delta_{\text{exp}}$  versus  $\delta_{\text{calcd}}$ ).

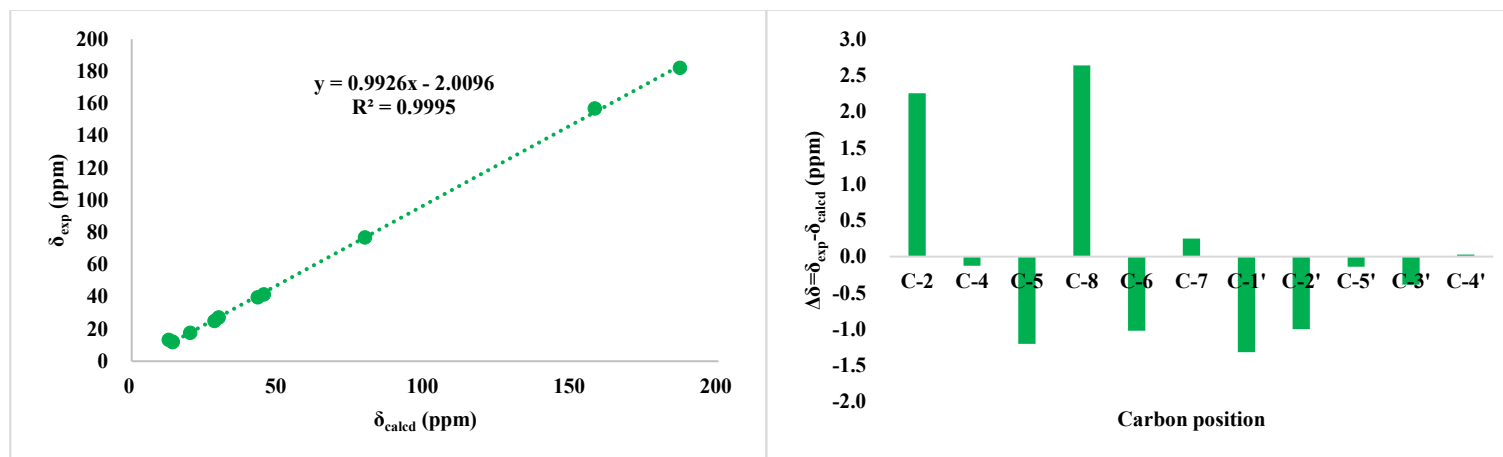

Figure S24. Left: Regression analysis of experimental versus calculated  $^1\text{H}$  NMR chemical shifts of **2** at mPW1PW91/6-311g(d,p) level; linear fitting was shown as a line; Right: Relative chemical shift errors between scaled  $^1\text{H}$  NMR and experimental  $^1\text{H}$  NMR for **2** ( $\delta_{\text{corr}}$  obtained by linear fit  $\delta_{\text{exp}}$  versus  $\delta_{\text{calcd}}$ ).

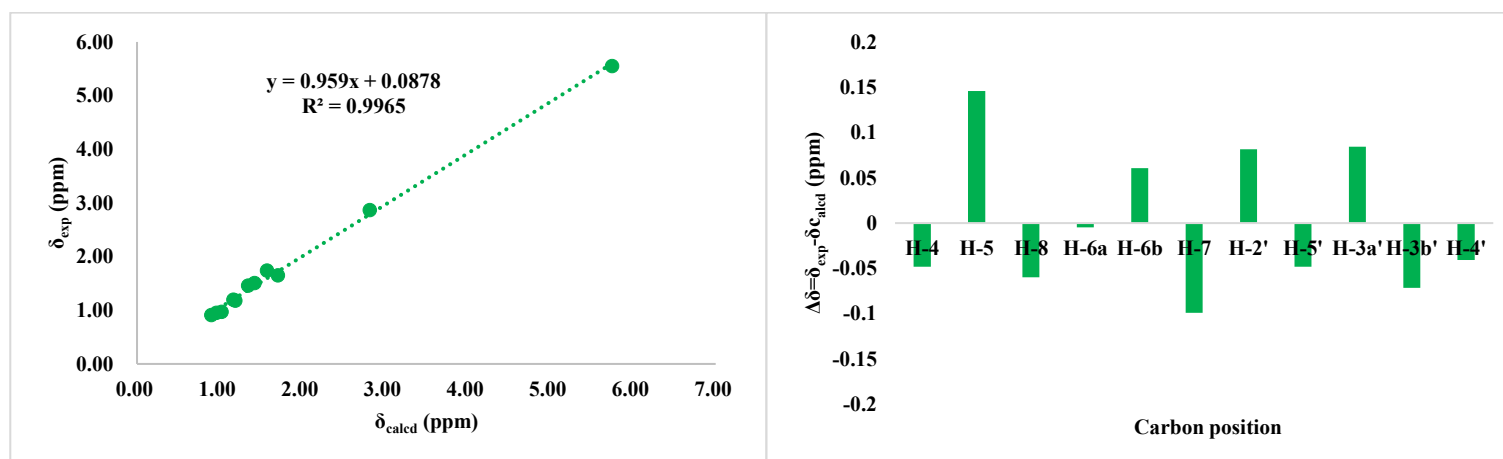

Table S13. The DP4+ probabilities of **1a**, **1b**, **1c** and **1d**.<sup>5-7</sup>

| Functional |      | Solvent         |           | Basis Set   |           | Tape of Data    | Functional |      | Solvent         |           | Basis Set   |           | Tape of Data    |
|------------|------|-----------------|-----------|-------------|-----------|-----------------|------------|------|-----------------|-----------|-------------|-----------|-----------------|
| mPW1PW91   |      | PCM             |           | 6-311G(d,p) |           | Unscaled Shifts | mPW1PW91   |      | PCM             |           | 6-311G(d,p) |           | Unscaled Shifts |
|            |      | DP4+            | 97.64%    | 0.01%       | 2.35%     | 0.00%           |            |      | DP4+            | 0.18%     | 0.00%       | 99.79%    | 0.04%           |
| Nuclei     | sp2? | Experiental (1) | <b>1a</b> | <b>1b</b>   | <b>1c</b> | <b>1d</b>       | Nuclei     | sp2? | Experiental (2) | <b>1a</b> | <b>1b</b>   | <b>1c</b> | <b>1d</b>       |
| C          | ×    | 157.12          | 157.9     | 158.9       | 157.9     | 158.9           | C          | ×    | 156.96          | 157.9     | 158.9       | 157.9     | 158.9           |
| C          |      | 76.58           | 80.7      | 78.8        | 79.5      | 79.3            | C          |      | 76.78           | 80.7      | 78.8        | 79.5      | 79.3            |
| C          |      | 41.77           | 45.1      | 45.2        | 45.0      | 45.1            | C          |      | 41.44           | 45.1      | 45.2        | 45.0      | 45.1            |
| C          |      | 13.33           | 14.5      | 12.7        | 12.6      | 14.6            | C          |      | 13.12           | 14.5      | 12.7        | 12.6      | 14.6            |
| C          |      | 24.95           | 25.5      | 28.2        | 28.2      | 25.8            | C          |      | 24.97           | 25.5      | 28.2        | 28.2      | 25.8            |
| C          |      | 11.71           | 13.7      | 13.8        | 13.9      | 13.3            | C          |      | 12.06           | 13.7      | 13.8        | 13.9      | 13.3            |
| C          | ×    | 182.45          | 186.9     | 187.7       | 186.9     | 188.7           | C          | ×    | 182.20          | 186.9     | 187.7       | 186.9     | 188.7           |
| C          |      | 39.64           | 43.5      | 43.8        | 42.9      | 43.2            | C          |      | 39.58           | 43.5      | 43.8        | 42.9      | 43.2            |
| C          |      | 15.79           | 17.4      | 18.3        | 19.9      | 21.6            | C          |      | 17.65           | 17.4      | 18.3        | 19.9      | 21.6            |
| C          |      | 28.02           | 30.2      | 30.6        | 29.6      | 29.2            | C          |      | 27.02           | 30.2      | 30.6        | 29.6      | 29.2            |
| C          |      | 11.69           | 13.7      | 13.8        | 13.9      | 14.2            | C          |      | 11.84           | 13.7      | 13.8        | 13.9      | 14.2            |
| H          |      | 5.55            | 5.64      | 5.77        | 5.75      | 5.72            | H          |      | 5.55            | 5.64      | 5.77        | 5.75      | 5.72            |
| H          |      | 1.70            | 1.55      | 1.57        | 1.57      | 1.57            | H          |      | 1.74            | 1.55      | 1.57        | 1.57      | 1.57            |
| H          |      | 0.98            | 0.95      | 0.96        | 0.96      | 0.96            | H          |      | 0.95            | 0.95      | 0.96        | 0.96      | 0.96            |
| H          |      | 1.16            | 1.14      | 1.43        | 1.16      | 1.19            | H          |      | 1.20            | 1.14      | 1.43        | 1.16      | 1.19            |
| H          |      | 1.53            | 1.62      | 1.19        | 1.42      | 1.56            | H          |      | 1.51            | 1.62      | 1.19        | 1.42      | 1.56            |
| H          |      | 0.92            | 0.98      | 1.02        | 1.02      | 1.00            | H          |      | 0.97            | 0.98      | 1.02        | 1.02      | 1.00            |
| H          |      | 2.87            | 2.73      | 2.77        | 2.82      | 2.87            | H          |      | 2.87            | 2.73      | 2.77        | 2.82      | 2.87            |
| H          |      | 1.08            | 1.05      | 1.06        | 1.19      | 1.23            | H          |      | 1.18            | 1.05      | 1.06        | 1.19      | 1.23            |
| H          |      | 1.53            | 1.45      | 1.44        | 1.34      | 1.79            | H          |      | 1.46            | 1.45      | 1.44        | 1.34      | 1.79            |
| H          |      | 1.66            | 1.75      | 1.83        | 1.70      | 1.31            | H          |      | 1.65            | 1.75      | 1.83        | 1.70      | 1.31            |
| H          |      | 0.95            | 0.94      | 0.92        | 0.90      | 0.85            | H          |      | 0.91            | 0.94      | 0.92        | 0.90      | 0.85            |

## 2.2 ECD calculation details for **1a**, **1c**, **1e** and **1f**

Conformation searches based on molecular mechanics with MMFF94s force field were performed for (4*R*,5*S*,2'*S*)-**1** (**1a**), (4*R*,5*R*,2'*R*)-**1** (**1c**), (4*S*,5*S*,2'*S*)-**1** (**1e**) and (4*S*,5*R*,2'*R*)-**1** (**1f**) gave 15, 16, 16 and 15 conformers with populations higher than 1%. All these conformers were further optimized by the density functional theory method at the B3LYP/6-31G(d) level in Gaussian 09 program package, led to eleven (**1a1** to **1a11**), eleven (**1c1** to **1c11**), eleven (**1e1** to **1e11**) and eleven (**1f1** to **1f11**) conformers within a 2.0 kcal/mol energy threshold from global minimum, respectively. These predominant conformers were subjected to theoretical calculation of ECD using time-dependent density functional theory (TDDFT) at CAM-B3LYP/6-311+G (d,p) level in air. The calculated ECD curves for (4*R*,5*S*,2'*S*)-**1** (**1a**), (4*R*,5*R*,2'*R*)-**1** (**1c**), (4*S*,5*S*,2'*S*)-**1** (**1e**), (4*S*,5*R*,2'*R*)-**1** (**1f**) and their and weighted ECD were all generated using SpecDis 1.60 with  $\sigma = 0.3$  eV, and UV shift 2, respectively.<sup>8</sup> As shown in **Figure S27**, the calculated ECD spectrum of (4*R*,5*S*,2'*S*)-**1** (**1a**) matched well with the **1** of the experimental one. Meanwhile, the calculated ECD spectrum of (4*S*,5*S*,2'*S*)-**1** (**1e**) matched well with **2** of the experimental one, suggesting the absolute configuration of **1** to be 4*R*,5*S*,2'*S*, and that of **2** to be 4*S*,5*S*,2'*S*.

Figure S25. Optimized conformers of **1e** (**1e1-1e11**).

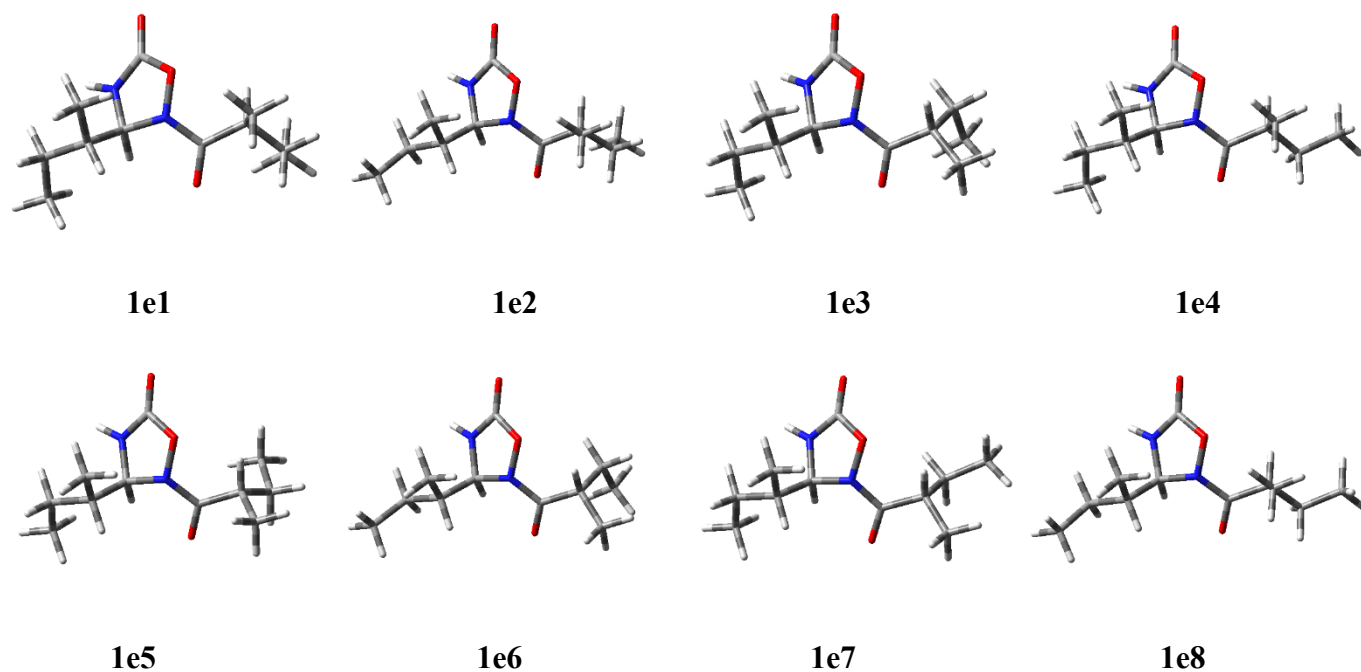

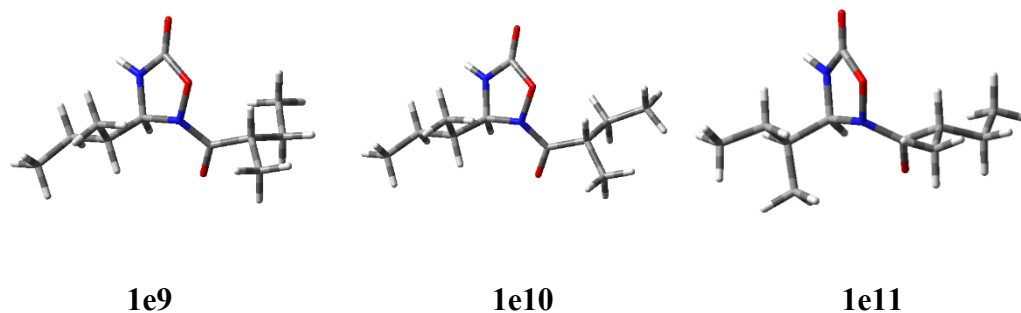

Table S14. Energy analysis for conformers of **1e1-1e11** at B3LYP/6-31G(d) level in the gas phase

| species     | $E'=E+ZPE$  | $E$         | $H$         | $G$         | $\Delta E$ (kcal/mol) | $P_E\%$ |
|-------------|-------------|-------------|-------------|-------------|-----------------------|---------|
| <b>1e1</b>  | -766.294116 | -766.276012 | -766.275068 | -766.341056 | 0.711585              | 6.90%   |
| <b>1e2</b>  | -766.294803 | -766.276598 | -766.275653 | -766.342177 | 0.0081575             | 22.62%  |
| <b>1e3</b>  | -766.292372 | -766.274166 | -766.273222 | -766.33966  | 1.587575              | 1.57%   |
| <b>1e4</b>  | -766.293105 | -766.274954 | -766.27401  | -766.34013  | 1.29265               | 2.59%   |
| <b>1e5</b>  | -766.294115 | -766.276012 | -766.275068 | -766.341059 | 0.7097025             | 6.92%   |
| <b>1e6</b>  | -766.292877 | -766.274704 | -766.27376  | -766.339932 | 1.416895              | 2.10%   |
| <b>1e7</b>  | -766.293419 | -766.275217 | -766.274273 | -766.340717 | 0.9243075             | 4.82%   |
| <b>1e8</b>  | -766.293941 | -766.275618 | -766.274674 | -766.341499 | 0.4336025             | 11.03%  |
| <b>1e9</b>  | -766.294806 | -766.276599 | -766.275655 | -766.34219  | 0                     | 22.93%  |
| <b>1e10</b> | -766.294112 | -766.275842 | -766.274898 | -766.34161  | 0.36395               | 12.41%  |
| <b>1e11</b> | -766.294108 | -766.276008 | -766.275064 | -766.340942 | 0.78312               | 6.11%   |

$E$ ,  $E'$ ,  $H$ ,  $G$ : total energy, total energy with zero point energy (ZPE), enthalpy, and Gibbs free energy

Figure S26. Optimized conformers of **1f** (**1f1-1f11**).

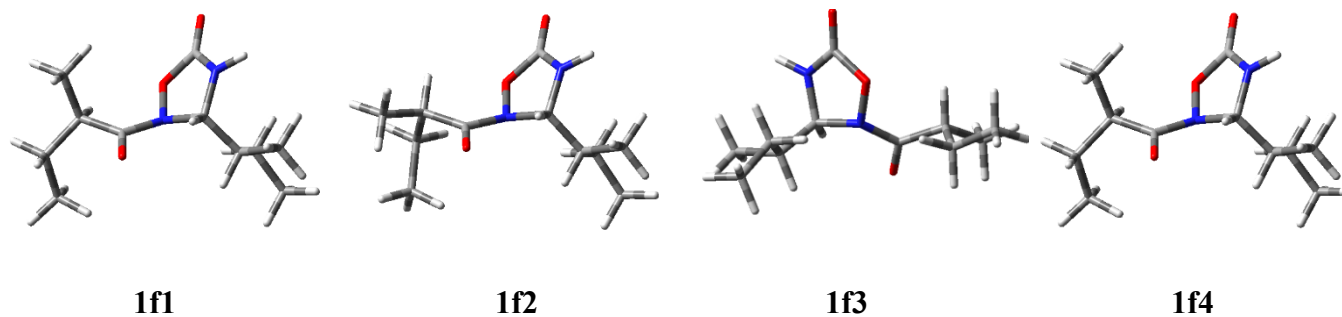

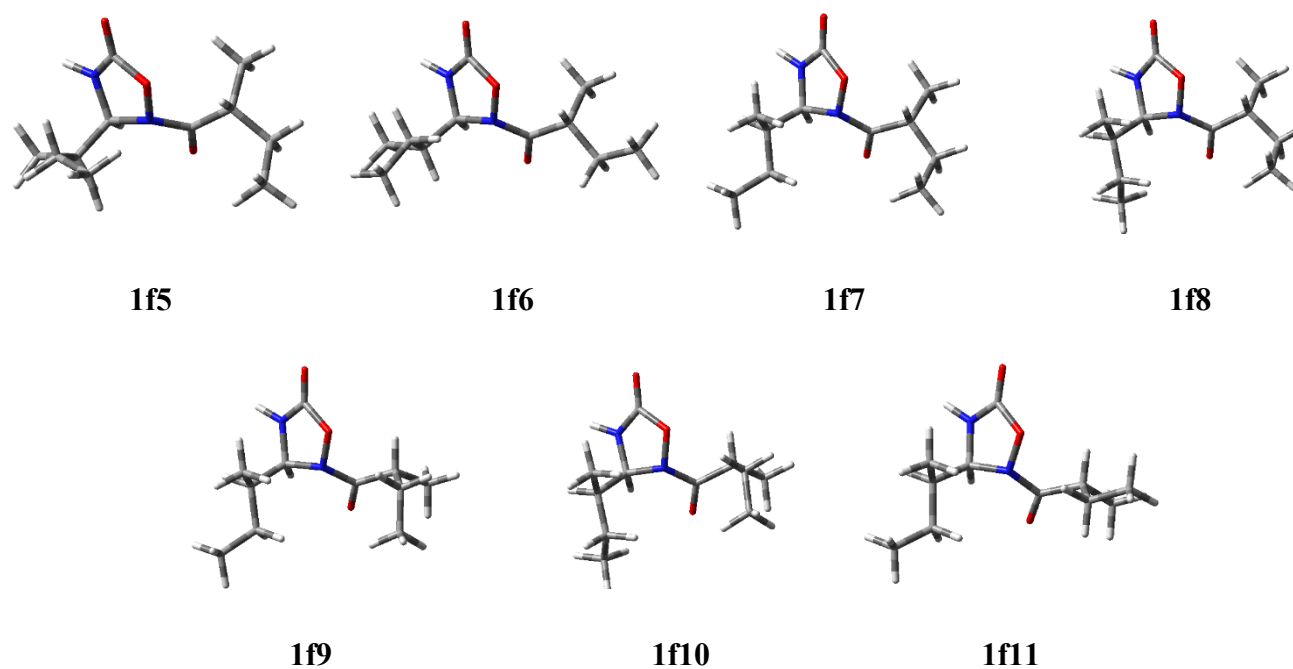

Table S15. Energy analysis for conformers of **1f1-1f11** at B3LYP/6-31G(d) level in the gas phase

| species     | $E'=E+ZPE$  | $E$         | $H$         | $G$         | $\Delta E$ (kcal/mol) | $P_E\%$ |
|-------------|-------------|-------------|-------------|-------------|-----------------------|---------|
| <b>1f1</b>  | -766.294853 | -766.276636 | -766.275692 | -766.341877 | 0                     | 21.21%  |
| <b>1f2</b>  | -766.293322 | -766.275185 | -766.274241 | -766.340223 | 1.037885              | 3.68%   |
| <b>1f3</b>  | -766.293927 | -766.275694 | -766.27475  | -766.341216 | 0.4147775             | 10.53%  |
| <b>1f4</b>  | -766.294853 | -766.276638 | -766.275694 | -766.341875 | 0.001255              | 21.17%  |
| <b>1f5</b>  | -766.29267  | -766.274455 | -766.273511 | -766.340206 | 1.0485525             | 3.61%   |
| <b>1f6</b>  | -766.293689 | -766.275333 | -766.274389 | -766.3413   | 0.3620675             | 11.51%  |
| <b>1f7</b>  | -766.294663 | -766.27655  | -766.275606 | -766.34148  | 0.2491175             | 13.93%  |
| <b>1f8</b>  | -766.294491 | -766.276534 | -766.27559  | -766.340521 | 0.85089               | 5.04%   |
| <b>1f9</b>  | -766.293111 | -766.275105 | -766.27416  | -766.339588 | 1.4363475             | 1.88%   |
| <b>1f10</b> | -766.293096 | -766.275124 | -766.274179 | -766.339562 | 1.4526625             | 1.83%   |
| <b>1f11</b> | -766.293704 | -766.275618 | -766.274674 | -766.340621 | 0.78814               | 5.61%   |

$E$ ,  $E'$ ,  $H$ ,  $G$ : total energy, total energy with zero point energy (ZPE), enthalpy, and Gibbs free energy

Figure S27. Comparison of the calculated ECD spectra with the experimental spectrum.

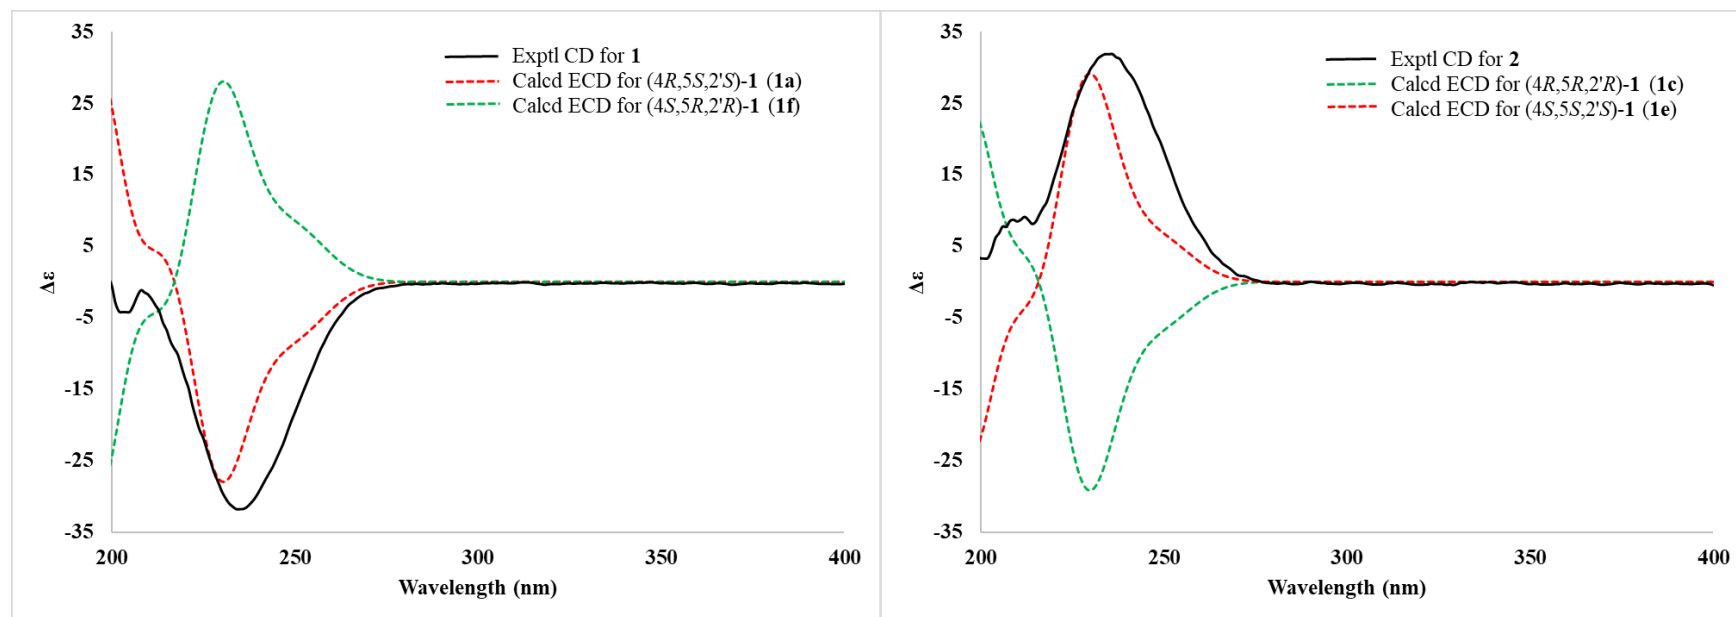

### 2.3 Determination of the substitution pattern.

The  $^{13}\text{C}$  NMR chemical shifts have been calculated using the GIAO method (the same as above) on the most stable conformer for each regioisomer (see table below) and the DP4+ probability was calculated.<sup>6-7</sup>

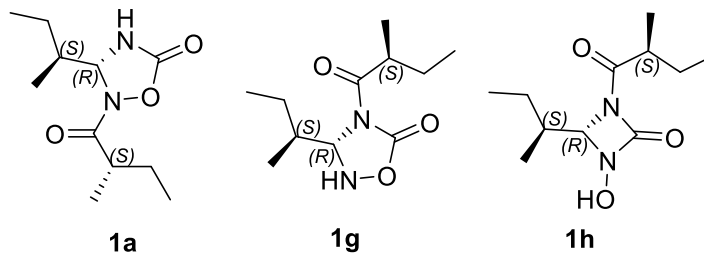

Figure S28. Optimized conformers of **1g** (**1g1-1g10**).

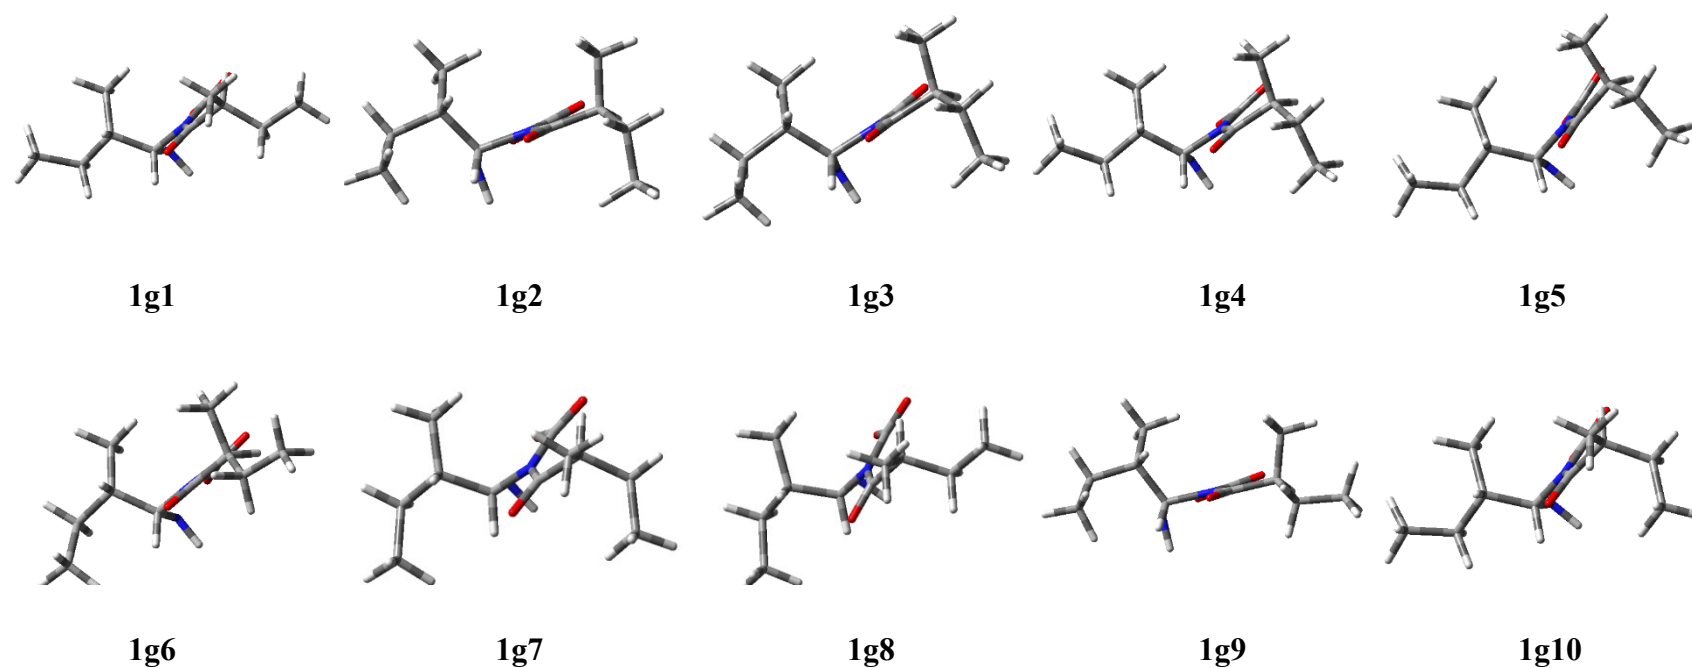

Table S16. Energy analysis for conformers of **1g1-1g10** at B3LYP/6-31G(d) level in the gas phase

| species     | $E'=E+ZPE$  | $E$         | $H$         | $G$         | $\Delta E$ (kcal/mol) | $P_E\%$ |
|-------------|-------------|-------------|-------------|-------------|-----------------------|---------|
| <b>1g1</b>  | -766.291066 | -766.273223 | -766.272279 | -766.337314 | 0.1123225             | 12.55%  |
| <b>1g2</b>  | -766.291066 | -766.273223 | -766.272279 | -766.337319 | 0.109185              | 12.62%  |
| <b>1g3</b>  | -766.291384 | -766.273565 | -766.272621 | -766.337493 | 0                     | 15.17%  |
| <b>1g4</b>  | -766.291383 | -766.273565 | -766.27262  | -766.337492 | 0.0006275             | 15.16%  |
| <b>1g5</b>  | -766.290088 | -766.272151 | -766.271207 | -766.336879 | 0.385285              | 7.92%   |
| <b>1g6</b>  | -766.289583 | -766.271771 | -766.270827 | -766.335809 | 1.05671               | 2.55%   |
| <b>1g7</b>  | -766.290228 | -766.272286 | -766.271342 | -766.337088 | 0.2541375             | 9.88%   |
| <b>1g8</b>  | -766.29009  | -766.272152 | -766.271208 | -766.336885 | 0.38152               | 7.97%   |
| <b>1g9</b>  | -766.28978  | -766.27205  | -766.271106 | -766.335639 | 1.163385              | 2.13%   |
| <b>1g10</b> | -766.290587 | -766.27264  | -766.271696 | -766.33742  | 0.0458075             | 14.05%  |

$E$ ,  $E'$ ,  $H$ ,  $G$ : total energy, total energy with zero point energy (ZPE), enthalpy, and Gibbs free energy



Figure S29. Optimized conformers of **1h** (**1h1-1h3**).

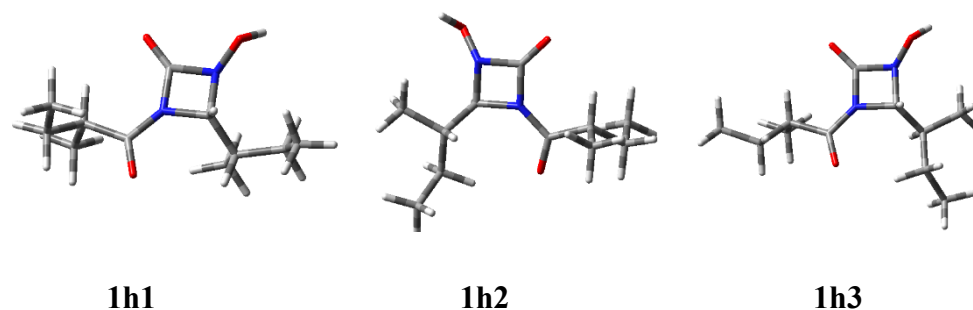

Table S17. Energy analysis for conformers of **1h1-1h3** at B3LYP/6-31G(d) level in the gas phase

| species    | $E'=E+ZPE$  | $E$         | $H$         | $G$         | $\Delta E$ (kcal/mol) | $P_E\%$ |
|------------|-------------|-------------|-------------|-------------|-----------------------|---------|
| <b>1h1</b> | -766.268634 | -766.249848 | -766.248904 | -766.31705  | 1.037885              | 14.04%  |
| <b>1h2</b> | -766.267439 | -766.248639 | -766.247695 | -766.316072 | 1.65158               | 4.98%   |
| <b>1h3</b> | -766.270367 | -766.251592 | -766.250647 | -766.318704 | 0                     | 80.97%  |

$E, E', H, G$ : total energy, total energy with zero point energy (ZPE), enthalpy, and Gibbs free energy

Table S18.  $^{13}\text{C}$  NMR calculation details for **1g**

| position   | <b>1g1</b> | <b>1g2</b> | <b>1g3</b> | <b>1g4</b> | <b>1g5</b> | <b>1g6</b> | <b>1g7</b> | <b>1g8</b> | <b>1g9</b> | <b>1g10</b> | $\delta_{\text{caled}}$ |
|------------|------------|------------|------------|------------|------------|------------|------------|------------|------------|-------------|-------------------------|
| C-2        | 162.6432   | 162.6437   | 162.6067   | 162.6061   | 162.7075   | 162.6749   | 162.698    | 162.708    | 162.5493   | 162.5605    | 162.63                  |
| C-4        | 78.7623    | 78.7631    | 83.4697    | 83.478     | 78.6391    | 78.9161    | 78.8983    | 78.64      | 83.8677    | 83.7732     | 81.00                   |
| C-1'       | 184.4082   | 184.4098   | 183.8726   | 183.8731   | 185.3701   | 183.236    | 185.1699   | 185.3714   | 183.147    | 185.1679    | 184.52                  |
| C-2'       | 44.6801    | 44.6784    | 45.0754    | 45.0734    | 44.0415    | 40.9575    | 43.0767    | 44.0414    | 41.415     | 43.7087     | 44.24                   |
| C-5'       | 21.1577    | 21.1597    | 21.2176    | 21.2187    | 17.3521    | 14.5622    | 13.9444    | 17.3568    | 14.6054    | 13.9319     | 18.54                   |
| C-3'       | 29.447     | 29.4466    | 29.1856    | 29.1865    | 27.6307    | 29.3639    | 31.4623    | 27.6364    | 29.5349    | 31.7043     | 29.60                   |
| C-4'       | 13.7621    | 13.7624    | 13.7338    | 13.7351    | 12.3401    | 8.9472     | 13.6209    | 12.3415    | 8.8898     | 13.6888     | 13.28                   |
| C-5        | 41.4266    | 41.4325    | 41.2985    | 41.294     | 41.7149    | 40.8774    | 41.4695    | 41.7155    | 41.149     | 41.1744     | 41.38                   |
| C-6        | 28.6803    | 28.6802    | 28.8646    | 28.8648    | 28.7396    | 29.0568    | 28.7156    | 28.7367    | 28.9507    | 29.0292     | 28.81                   |
| C-8        | 14.7224    | 14.7226    | 10.1347    | 10.1331    | 14.9526    | 14.8351    | 14.8132    | 14.9514    | 10.0322    | 10.2619     | 12.65                   |
| C-7        | 12.702     | 12.704     | 13.2159    | 13.2156    | 12.6201    | 12.5894    | 12.5331    | 12.6207    | 13.2699    | 13.1765     | 12.90                   |
| population | 12.55%     | 12.62%     | 15.17%     | 15.16%     | 7.92%      | 2.55%      | 9.88%      | 7.97%      | 2.13%      | 14.05%      |                         |

Table S19.  $^{13}\text{C}$  NMR calculation details for **1h**

| position   | <b>1h1</b> | <b>1h2</b> | <b>1h3</b> | $\delta_{\text{caled}}$ |
|------------|------------|------------|------------|-------------------------|
| C-2        | 89.1319    | 89.098     | 83.7643    | 84.78                   |
| C-4        | 162.4175   | 162.2763   | 161.9614   | 162.04                  |
| C-5        | 43.8431    | 44.3136    | 39.0006    | 39.95                   |
| C-6        | 28.7883    | 28.5652    | 29.5766    | 29.42                   |
| C-8        | 15.3135    | 15.3214    | 13.8436    | 14.12                   |
| C-7        | 12.849     | 12.7867    | 12.9206    | 12.90                   |
| C-1'       | 183.0277   | 183.0198   | 182.797    | 182.84                  |
| C-2'       | 46.8253    | 46.4001    | 46.7224    | 46.72                   |
| C-5'       | 21.074     | 17.5277    | 20.9669    | 20.81                   |
| C-3'       | 30.3019    | 27.268     | 30.8867    | 30.62                   |
| C-4'       | 13.7008    | 12.3817    | 13.7383    | 13.67                   |
| population | 14.04%     | 4.98%      | 80.97%     |                         |

Table S20. The DP4+ probabilities of **1a**, **1g** and **1h**.

| Functional | Solvent | Basis Set                | Tape of Data    |           |           |
|------------|---------|--------------------------|-----------------|-----------|-----------|
| mPW1PW91   | PCM     | 6-311G(d,p)              | Unscaled Shifts |           |           |
|            | DP4+    | 99.92%                   | 0.08%           | 0.00%     |           |
| Nuclei     | sp2?    | Experiental ( <b>1</b> ) | <b>1a</b>       | <b>1g</b> | <b>1h</b> |
| C          | ×       | 157.12                   | 157.94          | 162.63    | 162.04    |
| C          |         | 76.58                    | 80.68           | 81.00     | 84.78     |
| C          |         | 41.77                    | 45.06           | 41.38     | 39.95     |
| C          |         | 13.33                    | 14.48           | 12.65     | 14.12     |
| C          |         | 24.95                    | 25.46           | 28.81     | 29.42     |
| C          |         | 11.71                    | 13.71           | 12.90     | 12.90     |
| C          | ×       | 182.45                   | 186.86          | 184.52    | 182.84    |
| C          |         | 39.64                    | 43.53           | 44.24     | 46.72     |
| C          |         | 15.79                    | 17.40           | 18.54     | 20.81     |
| C          |         | 28.02                    | 30.23           | 29.60     | 30.62     |
| C          |         | 11.69                    | 13.66           | 13.28     | 13.67     |

### 3. References

- 1 H. Goto and E. Osawa, *J. Am. Chem. Soc.*, 1989, **111**, 8950-8951.
- 2 H. Gotō and E. Ōsawa, *J. Chem. Soc., Perkin Trans. 2*, 1993, 187-198.
- 3 M.J. Frisch, G.W. Trucks, H.B. Schlegel, G.E. Scuseria, M.A. Robb, J.R. Cheeseman, G. Scalmani, V. Barone, B. Mennucci, G.A. Petersson, H. Nakatsuji, M. Caricato, X. Li, H.P. Hratchian, A.F. Izmaylov, J. Bloino, G. Zheng, J.L. Sonnenberg, M. Hada, M. Ehara, K. Toyota, R. Fukuda, J. Hasegawa, M. Ishida, T. Nakajima, Y. Honda, O. Kitao, H. Nakai, T. Vreven, J.A. Montgomery, Jr., J. E. Peralta, F. Ogliaro, M. Bearpark, J.J. Heyd, E. Brothers, K.N. Kudin, V.N. Staroverov, R. Kobayashi, J. Normand, K. Raghavachari, A. Rendell, J.C. Burant, S.S. Iyengar, J. Tomasi, M. Cossi, N. Rega, J.M. Millam, M. Klene, J.E. Knox, J.B. Cross, V. Bakken, C. Adamo, J. Jaramillo, R. Gomperts, R.E. Stratmann, O. Yazyev, A.J. Austin, R. Cammi, C. Pomelli, J.W. Ochterski, R.L. Martin, K. Morokuma, V.G. Zakrzewski, G.A. Voth, P. Salvador, J.J. Dannenberg, S. Dapprich, A.D. Daniels, O. Farkas, J.B. Foresman, J.V. Ortiz, J. Cioslowski, and D. J. Fox, Gaussian 09, Revision C.01, Gaussian, Inc., Wallingford CT, 2010;
- 4 Z. Zhao, H. Chen, B. Wu, L. Zhang, Z. Li, T. Feng and J. Liu, *J. Org. Chem.*, 2017, **82**, 7974-7979.
- 5 M. M. Zanardi, A. G. Suárez and A. M. Sarotti, *J. Org. Chem.*, 2017, **82**, 1873-1879.
- 6 N. Grimblat, M. M. Zanardi and A. M. Sarotti, *J. Org. Chem.*, 2015, **80**, 12526-12534.
- 7 S. G. Smith and J. M. Goodman, *J. Am. Chem. Soc.*, 2010, **132**, 12946-12959.
- 8 T. Bruhn, A. Schaumlöffel, Y. Hemberger and G. S. Bringmann, *SpecDis*, version 1.60; University of Würzburg: Würzburg, Germany, 2012.
